# Supplementary material for: Enol ethers as carbonyl surrogates in a modification of the Povarov synthesis of 3-aryl quinolines and their anti-Toxoplasma activity
Source: Royal Society of Chemistry journal article supplement (doi:10.1039/c6ob01083k), 2016-01-01

### General Information:

All reagents were obtained from Sigma-Aldrich and used as received. Solvents were freshly distilled (DCM was distilled over  $\text{CaH}_2$ , toluene was distilled over sodium/benzophenone). All reactions were performed with oven-dried glassware under dry  $\text{N}_2$  atmosphere. Thin layer chromatography (TLC) was performed using aluminium sheets precoated with silica gel 60F<sub>254</sub> (Macherey-Nagel) and visualized using 254 nm UV light.  $^1\text{H}$  and  $^{13}\text{C}$  NMR spectra were recorded on a Bruker AV 600 spectrometer using  $\text{CDCl}_3$  or methanol- $d_4$  as solvents. Chemical shifts ( $\delta$ ) are reported in ppm and coupling constants (J) are expressed in Hertz (Hz).

### General procedure for preparation of enol ethers:

Methoxymethyltriphenylphosphine chloride (1.2 eq) was dissolved in THF under  $\text{N}_2$  (1 mM) and cooled to  $0^\circ\text{C}$  in an ice bath. LiHMDS (1.3 eq, 1M solution in THF) was added dropwise. The reaction was allowed to stir for 20 minutes at  $0^\circ\text{C}$  to allow for imine formation. The benzaldehyde (1.0 eq) was dissolved in THF (1 mM) and added dropwise to the ylide solution. The reaction was allowed to warm to room temperature over 2 hours, then quenched by the addition of a saturated  $\text{NH}_4\text{Cl}$  solution. The reaction mixture was extracted with DCM, and the organic layers were combined and concentrated under reduced pressure. The crude product was purified by silica gel chromatography using a hexane:EtOAc (9:1) gradient elution to afford the desired product.

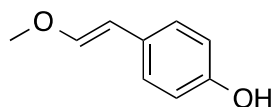

**4-(2-methoxyethenyl)-phenol (3a):** colourless oil (>95%)

Major isomer (2:1)

$^1\text{H}$  NMR (600 MHz,  $\text{CDCl}_3$ ):  $\delta$  3.75 (3H, s), 5.16 (1H, d,  $J = 7.0$  Hz), 6.05 (1H, d,  $J = 7.0$  Hz), 6.75 (2H, d,  $J = 8.7$  Hz), 7.46 (2H, d,  $J = 8.7$  Hz)

Minor Isomer

$^1\text{H}$  NMR (600 MHz,  $\text{CDCl}_3$ ):  $\delta$  3.66 (3H, s), 5.77 (1H, d,  $J = 13.0$  Hz), 6.74 (1H, d,  $J = 8.6$  Hz), 6.92 (2H, d,  $J = 13.0$  Hz), 7.11 (2H, d,  $J = 8.5$  Hz)

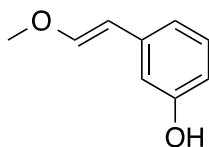

**3-(2-methoxyethenyl)-phenol (3b):** colourless oil (74%); filtered through a silica plug and used without further purification.

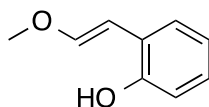

**2-(2-methoxyethenyl)-phenol (3c):** colourless oil (33%);  $^1\text{H}$  NMR (600 MHz,  $\text{CDCl}_3$ ):  $\delta$  3.84 (3H, s), 5.39 (1H, d,  $J = 7.1$  Hz), 6.06 (1H, d,  $J = 7.2$  Hz), 6.84 (1H, td,  $J = 1.2, 7.5$

Hz), 6.91 (1H, dd, J = 1.2, 8.1 Hz), 7.09 (1H, dd, J = 1.6, 7.7 Hz), 7.15 (1H, ddd, J = 1.7, 7.2, 8.1 Hz), 7.60 (1H, broad s);  $^{13}\text{C}$  NMR (150 MHz,  $\text{CDCl}_3$ ):  $\delta$  60.8, 105.4, 117.9, 120.2, 121.6, 128.9, 131.1, 143.5, 153.8.

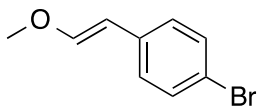

**1-bromo-4-(2-methoxyethenyl)-benzene (3d):** colourless oil (>95%)

Major isomer (7:2)

$^1\text{H}$  NMR (600 MHz,  $\text{CDCl}_3$ ):  $\delta$  3.68 (3H, s), 5.74 (1H, d, J = 13.0 Hz), 7.04 (1H, d, J = 13.0 Hz), 7.09 (2H, d, J = 8.4 Hz), 7.37 (2H, d, J = 8.5 Hz);  $^{13}\text{C}$  NMR (150 MHz,  $\text{CDCl}_3$ ):  $\delta$  56.7, 104.2, 119.3, 126.7, 131.7, 135.5

Minor Isomer

$^1\text{H}$  NMR (600 MHz,  $\text{CDCl}_3$ ):  $\delta$  3.79 (3H, s), 5.16 (1H, d, J = 7.0 Hz), 6.16 (1H, d, J = 7.0 Hz), 7.39 (2H, d, J = 8.7 Hz), 7.44 (2H, d, J = 8.6 Hz);  $^{13}\text{C}$  NMR (150 MHz,  $\text{CDCl}_3$ ):  $\delta$  60.9, 104.7, 119.1, 129.8, 131.3, 135.0

High resolution MS: m/z calc. for  $\text{C}_9\text{H}_{10}\text{BrO}^+$ : 211.9837, found 211.9826.

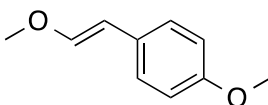

**1-methoxy-4-(2-methoxyethenyl)-benzene (3e):** colourless oil (70%); filtered through a silica plug and used without further purification.

High resolution MS: m/z calc. for  $\text{C}_{10}\text{H}_{12}\text{O}_2^+$ : 164.0837, found 164.0828.

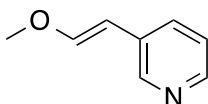

**3-(2-methoxyethenyl)-pyridine (3f):** colourless oil (92%)

Major Isomer

$^1\text{H}$  NMR (600 MHz,  $\text{CDCl}_3$ ):  $\delta$  3.71 (3H, s), 5.75 (1H, d, J = 13.1 Hz), 7.07 (1H, s, J = 13.1 Hz), 7.17 (1H, dd, J = 0.5, 4.8, 7.9 Hz), 7.52-7.53 (1H, m), 8.36 (1H, dd, J = 1.6, 4.8 Hz), 8.47 (1H, d, J = 2.2 Hz);  $^{13}\text{C}$  NMR (150 MHz,  $\text{CDCl}_3$ ):  $\delta$  56.8, 77.2, 101.5, 123.6, 131.7, 132.4, 146.9, 147.1, 150.3

Minor Isomer

$^1\text{H}$  NMR (600 MHz,  $\text{CDCl}_3$ ):  $\delta$  3.81 (3H, s), 5.20 (1H, d, J = 6.9 Hz), 6.26 (1H, d, J = 6.9 Hz), 7.19-7.21 (1H, m), 7.98 (1H, d, J = 8.0 Hz), 8.35-8.35 (1H, m), 8.67 (1H, s);  $^{13}\text{C}$  NMR (150 MHz,  $\text{CDCl}_3$ ):  $\delta$  60.8, 101.9, 123.1, 131.9, 134.9, 146.3, 149.1, 149.8

High resolution MS: m/z calc. for  $\text{C}_8\text{H}_{10}\text{NO}^+$ : 135.0684, found 135.0672.

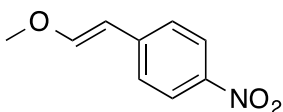

**1-(2-methoxyethenyl)-4-nitrobenzene (3g):** yellow oil (28%)

Major isomer

$^1\text{H}$  NMR (600 MHz,  $\text{CDCl}_3$ ):  $\delta$  3.87 (3H, s), 5.29 (1H, d,  $J = 7.0$  Hz), 6.34 (1H, d,  $J = 7.0$  Hz), 7.67 (2H, d,  $J = 7.9$  Hz), 8.10-8.13 (2H, m);  $^{13}\text{C}$  NMR (150 MHz,  $\text{CDCl}_3$ ):  $\delta$  57.1, 104.1, 125.1, 128.5, 143.0, 145.5, 152.6

Minor Isomer

$^1\text{H}$  NMR (600 MHz,  $\text{CDCl}_3$ ):  $\delta$  3.75 (3H, s), 5.84 (1H, d,  $J = 13.0$  Hz), 7.23 (1H, d,  $J = 13.0$  Hz), 7.32 (2H, d,  $J = 8.8$  Hz), 8.10-8.13 (2H, m);  $^{13}\text{C}$  NMR (150 MHz,  $\text{CDCl}_3$ ):  $\delta$  61.5, 103.8, 123.8, 124.3, 143.9, 145.2, 151.7

High resolution MS:  $m/z$  calc. for  $\text{C}_9\text{H}_{10}\text{NO}_3^+$ : 179.0582, found 179.0572.

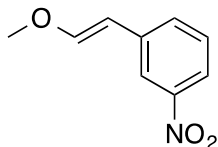

**1-(2-methoxyethenyl)-3-nitrobenzene (3h)**: yellow oil (43%); filtered through a silica plug and used without further purification.

High resolution MS:  $m/z$  calc. for  $\text{C}_9\text{H}_{10}\text{NO}_3^+$ : 179.0582, found 179.0567.

**General procedure for the preparation of quinolines**: Aniline (1.2 eq) and ethyl glyoxalate (1.2 eq) were dissolved in DCM (0.5 mM) under  $\text{N}_2$  and allowed to stir for 20 minutes to allow for imine formation. Enol ether (1.0 eq) was dissolved in DCM (0.5 mM) and added to the reaction mixture. The reaction was cooled to  $0^\circ\text{C}$  in an ice bath, then TFA (1.05 eq) was added dropwise. The reaction was monitored by TLC. Upon completion (generally 5-15 minutes from addition of TFA), the reaction was quenched by the addition of a saturated  $\text{NaHCO}_3$  solution. The product was then extracted using DCM and concentrated under reduced pressure. The crude product was purified using silica gel chromatography with a hexane/EtOAc (9:1 – 1:1) solvent gradient to afford the desired product.

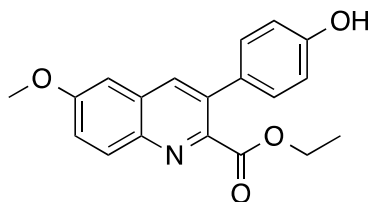

**Ethyl-3-(4-hydroxyphenyl)-6-methoxyquinoline-2-carboxylate (4a)**: pale yellow oil (82%);  $^1\text{H}$  NMR (600 MHz,  $\text{CDCl}_3$ ):  $\delta$  1.17 (3H, t,  $J = 7.2$  Hz), 3.95 (3H, s), 4.27 (2H, q,  $J = 7.2$  Hz), 6.91 (2H, dt,  $J = 3.0, 8.4$  Hz), 7.09 (1H, d,  $J = 2.8$  Hz), 7.30 (2H, dt,  $J = 3.0$  Hz, 8.4 Hz), 7.39 (1H, dd,  $J = 2.8, 9.2$  Hz), 8.05 (1H, s), 8.12 (1H, d,  $J = 9.3$  Hz);  $^{13}\text{C}$  NMR (150 MHz,  $\text{CDCl}_3$ ):  $\delta$  14.0, 55.7, 62.0, 104.7, 115.7, 123.4, 129.9, 130.0, 130.7, 131.0, 134.0, 136.1, 142.2, 148.0, 156.2, 159.2, 167.6; High resolution MS:  $m/z$  calc. for  $\text{C}_{19}\text{H}_{18}\text{NO}_4^+$ : 324.1236, found 324.1236.

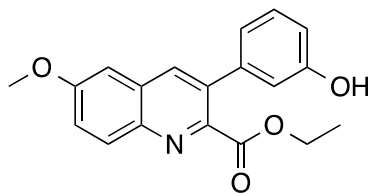

**Ethyl-3-(3-hydroxyphenyl)-6-methoxyquinoline-2-carboxylate (4b):** pale yellow oil (67%);  $^1\text{H NMR}$  (600 MHz,  $\text{CDCl}_3$ ):  $\delta$  1.13 (3H, t,  $J = 7.1$  Hz), 3.96 (3H, s), 4.26 (2H, q,  $J = 7.2$  Hz), 6.89 (1H, ddd,  $J = 0.9, 2.5, 8.1$  Hz), 6.94 (1H, t,  $J = 2.0$  Hz), 6.98 (1H, ddd,  $J = 0.9, 1.56, 7.6$  Hz), 7.10 (1H, d,  $J = 2.8$  Hz), 7.3 (1H, t,  $J = 7.9$  Hz), 7.43 (1H, dd,  $J = 2.9, 9.3$  Hz), 8.09 (1H, s), 8.18 (1H, d,  $J = 9.3$  Hz);  $^{13}\text{C NMR}$  (150 MHz,  $\text{CDCl}_3$ ):  $\delta$  13.9, 55.8, 62.0, 104.8, 115.1, 115.7, 121.1, 123.5, 129.7, 129.9, 131.4, 134.0, 136.1, 140.4, 142.6, 156.0, 159.3, 167.5; High resolution MS:  $m/z$  calc. for  $\text{C}_{19}\text{H}_{18}\text{NO}_4^+$ : 324.1236, found 324.1234.

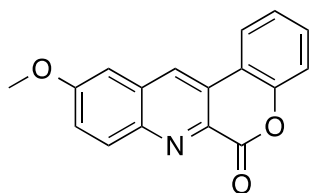

**Ethyl-3-(2-hydroxyphenyl)-6-methoxyquinoline-2-carboxylate (4c):** white solid (66%);  $^1\text{H NMR}$  (600 MHz,  $\text{CDCl}_3$ ):  $\delta$  4.024 (3H, s), 7.22 (1H, d,  $J = 2.8$  Hz), 7.40-7.43 (2H, m), 7.50 (1H, dd,  $J = 2.8, 9.3$  Hz), 7.54 (1H, ddd,  $J = 1.4, 7.1, 8.4$  Hz), 8.17 (1H, dd,  $J = 1.5, 7.9$  Hz), 8.78 (1H, s);  $^{13}\text{C NMR}$  (150 MHz,  $\text{CDCl}_3$ ):  $\delta$  56.0, 104.1, 107.2, 107.6, 110.0, 118.2, 123.1, 125.0, 125.5, 127.7, 131.1, 131.9, 132.8, 132.9, 136.4, 145.6, 150.8; High resolution MS:  $m/z$  calc. for  $\text{C}_{17}\text{H}_{12}\text{NO}_3^+$ : 278.0817, found 278.0805.

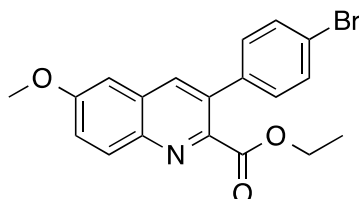

**Ethyl-3-(4-bromophenyl)-6-methoxyquinoline-2-carboxylate (4d):** pale yellow oil (76%);  $^1\text{H NMR}$  (600 MHz,  $\text{CDCl}_3$ ):  $\delta$  1.16 (3H, t,  $J = 7.1$  Hz), 3.96 (3H, s), 4.27 (2H, q,  $J = 7.1$  Hz), 7.31 (2H, dt,  $J = 2.4, 9.0$  Hz), 7.43 (1H, dd,  $J = 2.8, 9.2$  Hz), 7.58 (2H, dt,  $J = 2.3, 9.0$  Hz), 8.04 (1H, s), 8.14 (1H, d,  $J = 9.2$  Hz);  $^{13}\text{C NMR}$  (150 MHz,  $\text{CDCl}_3$ ):  $\delta$  14.0, 55.9, 62.2, 104.8, 122.5, 124.0, 129.8, 130.3, 131.3, 131.8, 133.3, 136.5, 137.8, 142.3, 147.1, 159.6, 166.7; High resolution MS:  $m/z$  calc. for  $\text{C}_{19}\text{H}_{17}\text{BrNO}_3^+$ : 386.0392, found 386.0397.

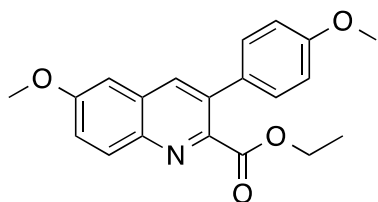

**Ethyl-3-(4-methoxyphenyl)-6-methoxyquinoline-2-carboxylate (4e):** pale yellow oil (75%);  $^1\text{H}$  NMR (600 MHz,  $\text{CDCl}_3$ ):  $\delta$  1.16 (3H, t,  $J = 7.1$  Hz), 3.87 (3H, s), 3.95 (3H, s), 4.28 (2H, q,  $J = 7.1$  Hz), 6.99 (2H, dt,  $J = 2.4, 9.0$  Hz), 7.09 (1H, d,  $J = 2.8$  Hz), 7.37 (2H, dt,  $J = 2.4, 8.4$  Hz), 7.40 (1H, dd,  $J = 2.8, 9.2$  Hz), 8.06 (1H, s), 8.14 (1H, d,  $J = 9.3$  Hz);  $^{13}\text{C}$  NMR (150 MHz,  $\text{CDCl}_3$ ):  $\delta$  14.0, 55.5, 55.8, 61.9, 104.7, 114.1, 123.2, 126.8, 131.2, 131.4, 133.9, 135.9, 142.2, 148.2, 159.2, 159.6, 167.6; High resolution MS:  $m/z$  calc. for  $\text{C}_{20}\text{H}_{20}\text{NO}_4^+$ : 338.1392, found 338.1379.

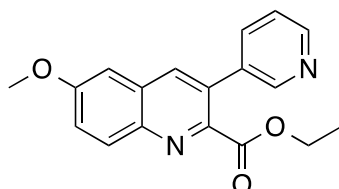

**Ethyl-3-(3-pyridinyl)-6-methoxyquinoline-2-carboxylate (4f):** white solid (58%);  $^1\text{H}$  NMR (600 MHz,  $\text{CDCl}_3$ ):  $\delta$  1.17 (3H, t,  $J = 7.1$  Hz), 3.97 (3H, s), 4.29 (2H, q,  $J = 7.1$  Hz), 7.13 (1H, d,  $J = 2.8$  Hz), 7.41 (1H, dd,  $J = 4.9, 7.8$  Hz), 7.46 (1H, dd,  $J = 2.8, 9.3$  Hz), 7.78 (1H, dt,  $J = 2.0, 7.8$  Hz), 8.07 (1H, s), 8.17 (1H, d,  $J = 9.2$  Hz), 8.68 (1H, dd,  $J = 1.6, 4.9$  Hz), 8.70 (1H, d,  $J = 2.3$  Hz);  $^{13}\text{C}$  NMR (150 MHz,  $\text{CDCl}_3$ ):  $\delta$  14.0, 55.9, 62.1, 104.7, 123.3, 124.1, 129.7, 131.0, 135.3, 136.4, 136.8, 143.1, 146.8, 148.7, 148.9, 166.6; High resolution MS:  $m/z$  calc. for  $\text{C}_{18}\text{H}_{17}\text{N}_2\text{O}_3^+$ : 309.1239, found 309.1231.

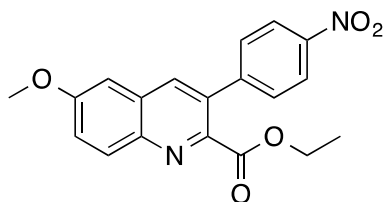

**Ethyl-3-(4-nitrophenyl)-6-methoxyquinoline-2-carboxylate (4g):** pale yellow oil (47%);  $^1\text{H}$  NMR (600 MHz,  $\text{CDCl}_3$ ):  $\delta$  1.19 (3H, t,  $J = 7.1$  Hz), 3.97 (3H, s), 4.29 (2H, q,  $J = 7.1$  Hz), 7.13 (1H, d,  $J = 2.8$  Hz), 7.48 (1H, dd,  $J = 2.8$  Hz, 9.3 Hz), 7.60 (2H, dt,  $J = 2.4, 9.0$  Hz), 8.08 (1H, s), 8.18 (1H, d,  $J = 9.3$  Hz), 8.33 (2H, dt,  $J = 2.4, 9.6$  Hz);  $^{13}\text{C}$  NMR (150 MHz,  $\text{CDCl}_3$ ):  $\delta$  14.1, 55.9, 62.2, 104.8, 114.8, 123.7, 124.4, 129.6, 129.6, 131.7, 132.7, 136.5, 146.3, 147.6, 159.9, 166.5; High resolution MS:  $m/z$  calc. for  $\text{C}_{19}\text{H}_{17}\text{N}_2\text{O}_5^+$ : 353.1137, found 353.1146.

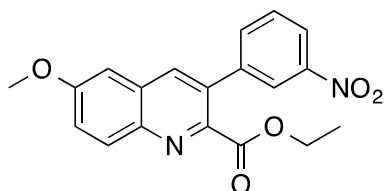

**Ethyl-3-(3-nitrophenyl)-6-methoxyquinoline-2-carboxylate (4h):** pale yellow oil (61%);  $^1\text{H}$  NMR (600 MHz,  $\text{CDCl}_3$ ):  $\delta$  1.20 (3H, t,  $J = 7.1$  Hz), 3.97 (3H, s), 4.30 (2H, q,  $J = 7.1$  Hz), 7.13 (1H, d,  $J = 2.7$  Hz), 7.47 (1H, dd,  $J = 2.8, 9.3$  Hz), 7.63 (1H, t,  $J = 7.9$  Hz), 7.75 (1H, ddd,  $J = 1.0, 1.7, 7.6$  Hz), 8.10 (1H, s), 8.17 (1H, d,  $J = 9.3$  Hz), 8.29 (1H, ddd,  $J = 1.0, 2.2, 8.2$  Hz), 8.33 (1H, t,  $J = 1.9$  Hz);  $^{13}\text{C}$  NMR (150 MHz,  $\text{CDCl}_3$ ):  $\delta$  14.1, 55.9, 62.2, 104.8, 122.8, 123.7, 124.2, 129.4, 129.7, 131.7, 132.4, 134.8, 136.7, 140.9,

143.1, 146.5, 148.4, 159.8, 166.5; High resolution MS: m/z calc. for  $C_{19}H_{17}N_2O_5^+$ : 353.1137, found 353.1137.

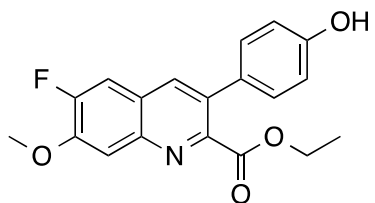

**Ethyl-3-(4-hydroxyphenyl)-6-fluoro-7-methoxyquinoline-2-carboxylate (4i):** pale yellow oil (69%);  $^1H$  NMR (600 MHz,  $CDCl_3$ ):  $\delta$  1.17 (3H, t,  $J = 7.1$  Hz), 4.03 (3H, s), 4.28 (2H, q,  $J = 7.1$  Hz), 6.91 (2H, d,  $J = 8.6$  Hz), 7.30 (2H, d,  $J = 8.6$  Hz), 7.46 (1H, d,  $J = 10.9$  Hz), 7.64 (1H, d,  $J = 8.1$  Hz), 8.04 (1H, s);  $^{13}C$  NMR (150 MHz,  $CDCl_3$ ):  $\delta$  14.0, 56.5, 62.1, 110.0, 111.1, 111.2, 115.7, 123.7, 130.0, 130.7, 132.2, 136.5, 144.3, 150.0, 152.8, 155.9, 167.4; High resolution MS: m/z calc. for  $C_{19}H_{17}FNO_4^+$ : 342.1142, found 342.1128.

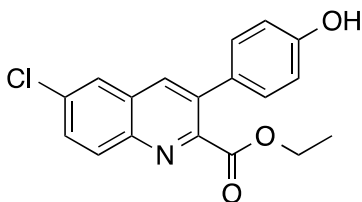

**Ethyl-3-(4-hydroxyphenyl)-6-chloroquinoline-2-carboxylate (4j):** pale yellow oil (56%);  $^1H$  NMR (600 MHz,  $CDCl_3$ ):  $\delta$  1.17 (3H, t,  $J = 7.2$  Hz), 4.29 (2H, q,  $J = 7.2$  Hz), 6.93 (2H, d,  $J = 8.6$  Hz), 7.32 (2H, d,  $J = 8.6$  Hz), 7.69 (1H, dd,  $J = 2.3, 9.0$  Hz), 7.85 (1H, d,  $J = 2.3$  Hz), 8.09 (1H, s), 8.18 (1H, d,  $J = 9.0$  Hz);  $^{13}C$  NMR (150 MHz,  $CDCl_3$ ):  $\delta$  14.0, 62.3, 115.8, 126.3, 129.1, 130.0, 130.2, 131.3, 134.3, 134.4, 136.4, 144.3, 151.0, 156.2, 167.1; High resolution MS: m/z calc. for  $C_{18}H_{14}ClNO_3^+$ : 328.0740, found 328.0747.

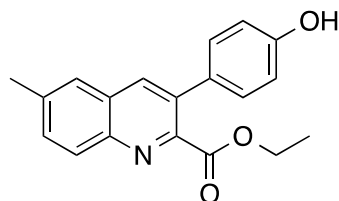

**Ethyl-3-(4-hydroxyphenyl)-6-methylquinoline-2-carboxylate (4k):** pale yellow oil (65%);  $^1H$  NMR (600 MHz,  $CDCl_3$ ):  $\delta$  1.17 (3H, t,  $J = 7.2$  Hz), 2.57 (3H, s), 4.28 (2H, q,  $J = 7.2$  Hz), 6.91 (2H, d,  $J = 8.6$  Hz), 7.12 (2H, d,  $J = 8.6$  Hz), 7.59 (1H, dd,  $J = 1.8, 8.7$  Hz), 7.62 (1H, s), 8.09 (1H, s), 8.14 (1H, d,  $J = 8.7$  Hz);  $^{13}C$  NMR (150 MHz,  $CDCl_3$ ):  $\delta$  14.0, 21.9, 62.2, 115.8, 126.5, 128.7, 129.1, 130.0, 131.4, 132.8, 133.5, 137.0, 138.7, 149.6, 156.3, 167.5; High resolution MS: m/z calc. for  $C_{19}H_{18}NO_3^+$ : 338.1287, found 338.1277.

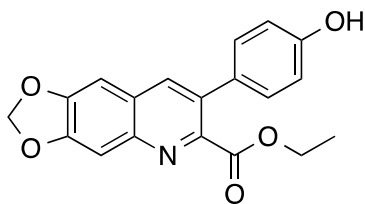

**Ethyl-3-(4-hydroxyphenyl)-[1,3]dioxolo-6,7-quinoline-2-carboxylate (4k):** pale yellow oil (84%);  $^1\text{H NMR}$  (600 MHz,  $\text{CDCl}_3$ ):  $\delta$  1.16 (3H, t,  $J = 7.1$  Hz), 4.27 (2H, q,  $J = 7.1$  Hz), 6.15 (2H, s), 6.90 (2H, d,  $J = 8.6$  Hz), 7.08 (1H, s), 7.27 (2H, d,  $J = 8.6$  Hz), 7.57 (1H, s), 8.0 (1H, s);  $^{13}\text{C NMR}$  (150 MHz,  $\text{CDCl}_3$ ):  $\delta$  14.0, 62.2, 102.4, 102.5, 105.3, 110.0, 115.7, 126.4, 130.0, 130.4, 132.3, 137.0, 137.0, 137.0, 149.7, 151.9, 156.1; High resolution MS:  $m/z$  calc. for  $\text{C}_{19}\text{H}_{16}\text{NO}_5^+$ : 338.1028, found 338.1024.

**General procedure for Chan-Lam coupling:** Aryl quinoline **4a** or **4i** (1 eq) was dissolved in dry DCM (0.1 mM) to which was added crushed molecular sieves (4A),  $\text{CuOAc}_2$  (1 eq), TEA (5 eq), and an aryl boronic acid (3 eq). The reaction was stirred under air at room temperature for two days. The crude reaction mixture was then concentrated and purified by silica gel chromatography using a Hexane:EtOAc 3:1 gradient for elution. This afforded the pure product as a colourless oil.

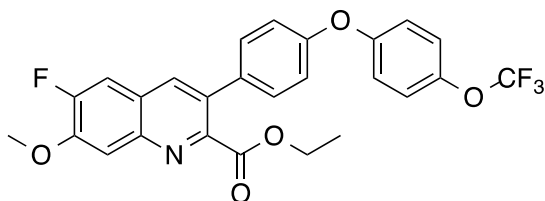

**Ethyl-6-Fluoro-7-methoxy-3-(4-(4-(trifluoromethoxy)phenoxy)phenyl)quinoline-2-carboxylate (5a):** colourless oil (80%);  $^1\text{H NMR}$  (600 MHz,  $\text{CDCl}_3$ ):  $\delta$  1.22 (3H, t,  $J = 7.1$  Hz), 4.08 (3H, s), 4.34 (2H, q,  $J = 7.1$  Hz), 7.10 (2H, d,  $J = 9.1$  Hz), 7.12 (2H, d,  $J = 8.7$  Hz), 7.25 (2H, dd,  $J = 0.7, 9.0$  Hz), 7.44 (2H, d,  $J = 8.7$  Hz), 7.51 (1H, d,  $J = 10.8$  Hz), 7.71 (1H, d,  $J = 8.0$  Hz), 8.11 (1H, s);  $^{13}\text{C NMR}$  (150 MHz,  $\text{CDCl}_3$ ):  $\delta$  14.1, 56.6, 62.2, 110.0, 111.2 (d,  $J = 19$  Hz), 119.0, 120.1, 120.7 (q,  $J = 255$  Hz), 122.9, 123.6 (d,  $J = 9$  Hz), 130.3, 131.9, 133.7, 136.7 (d,  $J = 6$  Hz), 144.7 (d,  $J = 73$  Hz), 149.7, 151.8, 152.9, 154.6, 155.5, 157.1, 167.0; High resolution MS:  $m/z$  calc. for  $\text{C}_{26}\text{H}_{20}\text{F}_5\text{NO}_5^+$ : 502.1278, found 502.1287.

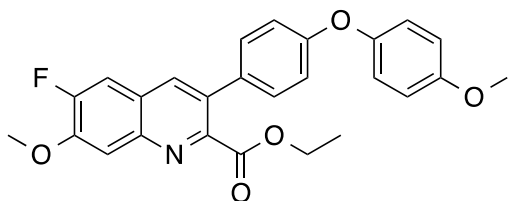

**Ethyl-6-Fluoro-7-methoxy-3-(4-(4-(methoxy)phenoxy)phenyl)quinoline-2-carboxylate (5b):** yellow oil (70%);  $^1\text{H NMR}$  (600 MHz,  $\text{CDCl}_3$ ):  $\delta$  1.20 (3H, t,  $J = 7.1$  Hz), 3.83 (3H, s), 4.05 (3H, s), 4.31 (2H, q,  $J = 7.1$  Hz), 6.92 (2H, d,  $J = 9.1$  Hz), 7.01 (2H, d,  $J = 8.8$  Hz), 7.03 (2H, d,  $J = 9.1$  Hz), 7.35 (2H, d,  $J = 8.8$  Hz), 7.48 (1H, d,  $J = 10.6$  Hz), 7.73 (1H, d,  $J = 8.05$ ), 8.09 (1H, s);  $^{13}\text{C NMR}$  (150 MHz,  $\text{CDCl}_3$ ):  $\delta$  14.0, 55.8, 56.6, 62.2, 109.7, 111.2 (d,  $J = 20$  Hz), 115.1, 117.5, 121.3, 123.7 (d,  $J = 9$  Hz), 130.0,

132.1 (d, J = 4 Hz), 136.9, 144.0, 149.5, 149.7, 151.8 (d, J = 14 Hz), 152.9, 154.6, 156.4, 159.0, 166.9; High resolution MS: m/z calc. for C<sub>26</sub>H<sub>23</sub>FNO<sub>5</sub><sup>+</sup>: 448.1560, found 448.1562.

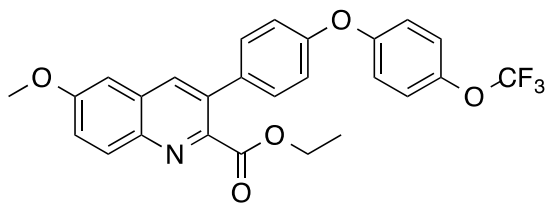

**Ethyl-6-Methoxy-3-(4-(4-(trifluoromethoxy)phenoxy)phenyl)quinoline-2-carboxylate (5c):** yellow oil (53%); <sup>1</sup>H NMR (600 MHz, CDCl<sub>3</sub>): δ 1.21 (3H, t, J = 7.1 Hz), 3.97 (3H, s), 4.31 (2H, q, J = 7.14 Hz), 7.07-7.12 (5H, m), 7.22 (2H, dd, J = 0.7, 9.0 Hz), 7.42-7.45 (3H, m), 8.10 (1H, s), 8.20 (1H, d, J = 9.2 Hz); <sup>13</sup>C NMR (150 MHz, CDCl<sub>3</sub>): δ 14.1, 55.8, 62.1, 104.8, 118.9, 120.2, 120.7 (q, J = 255 Hz), 122.8, 123.8, 129.9, 130.3 (d, J = 4.35) 131.1, 133.6, 134.0, 136.6, 142.1, 144.9, 147.5, 155.5, 157.1, 159.5, 166.9; High resolution MS: m/z calc. for C<sub>26</sub>H<sub>21</sub>F<sub>3</sub>NO<sub>5</sub><sup>+</sup>: 484.1372, found 484.1384.



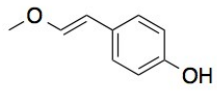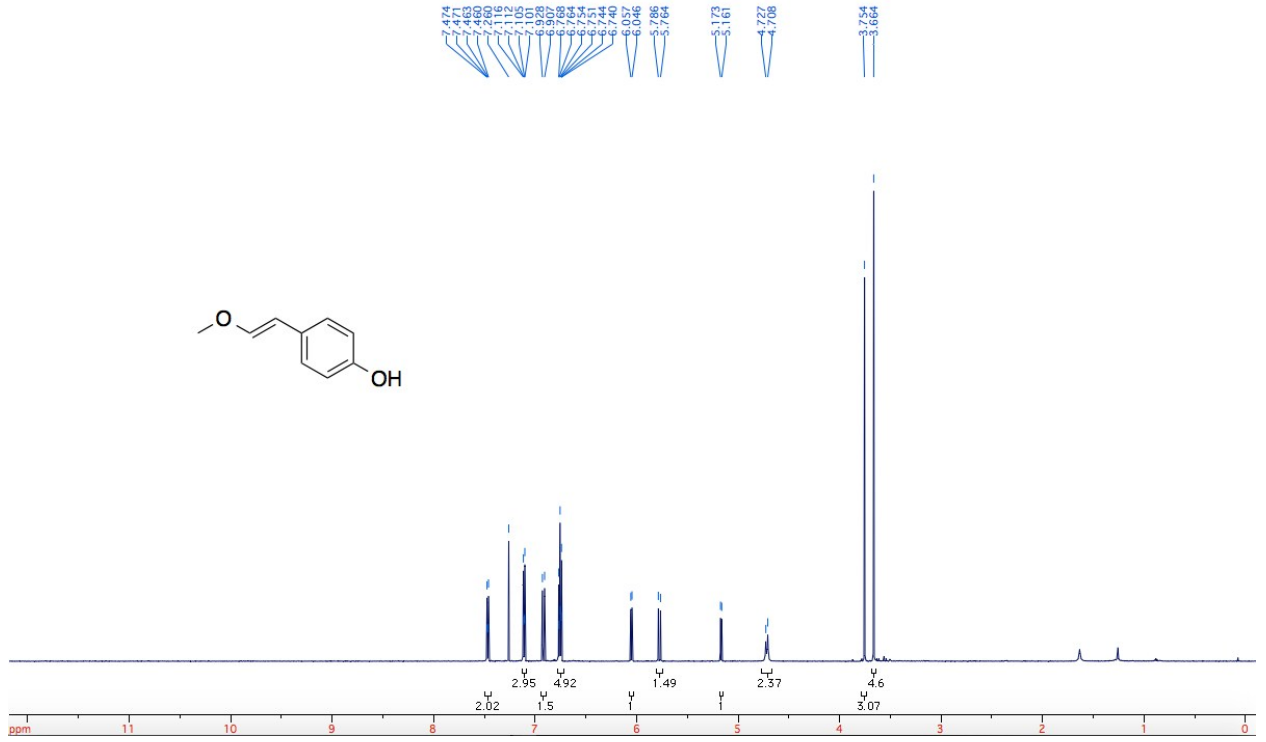

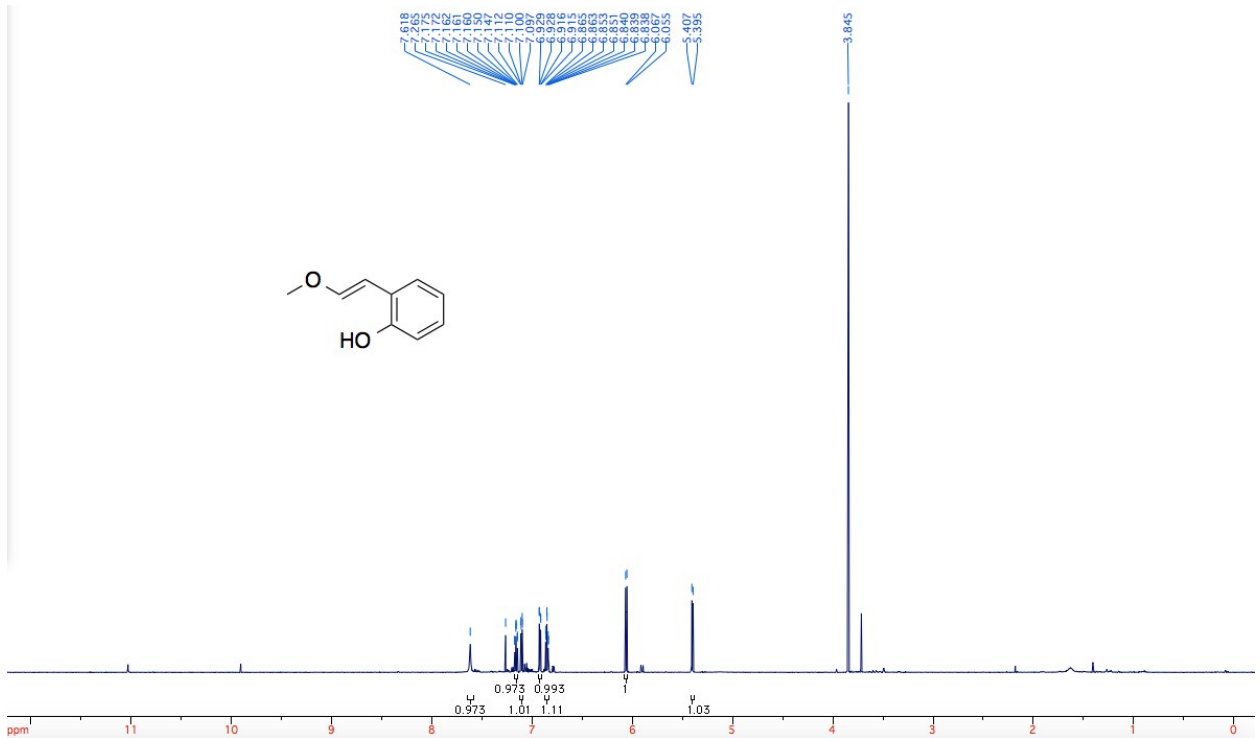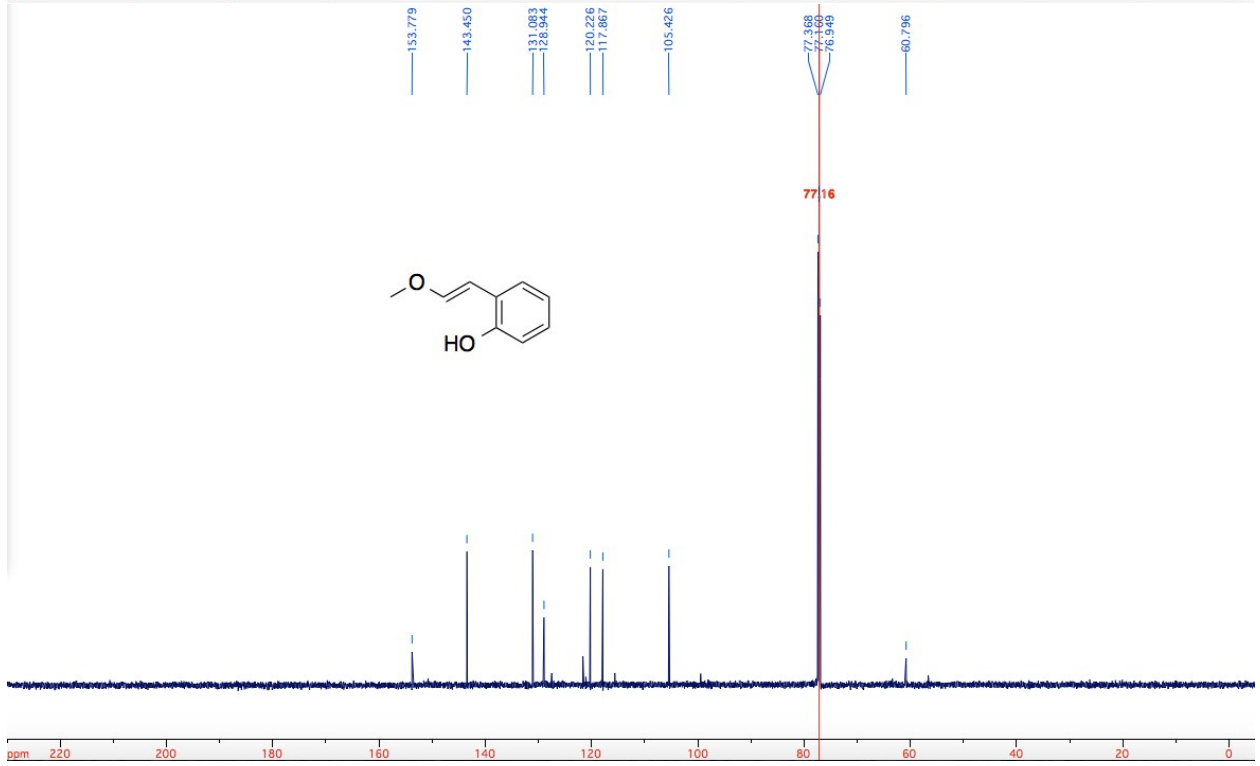

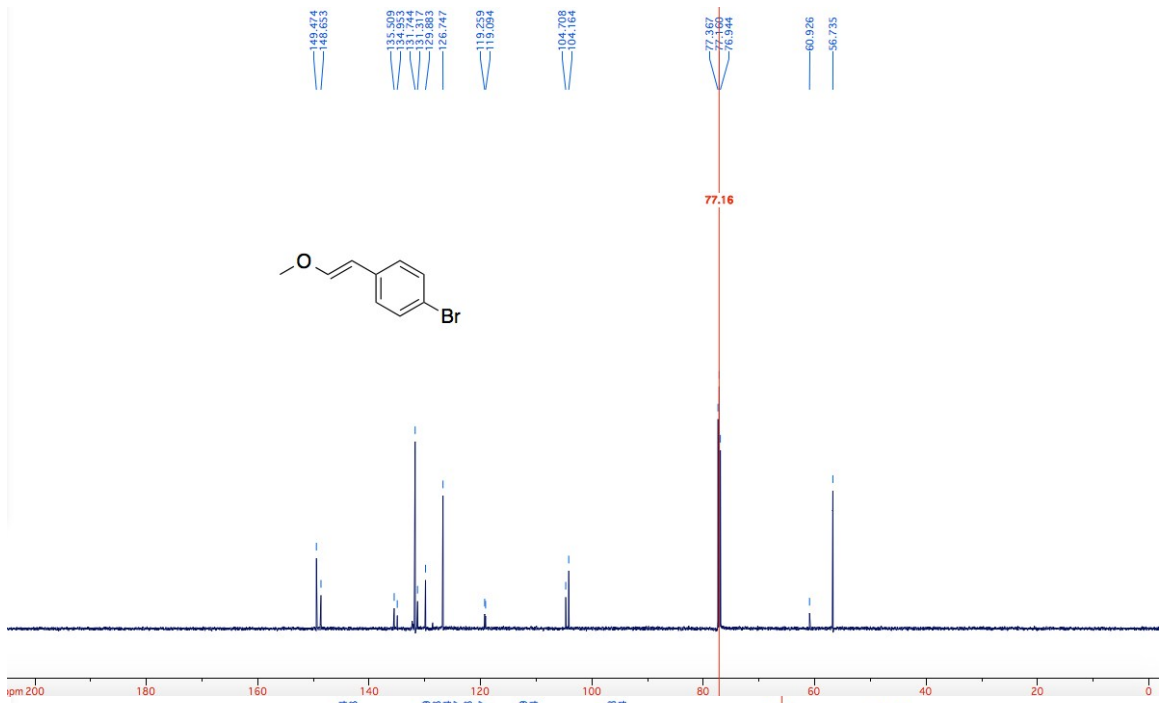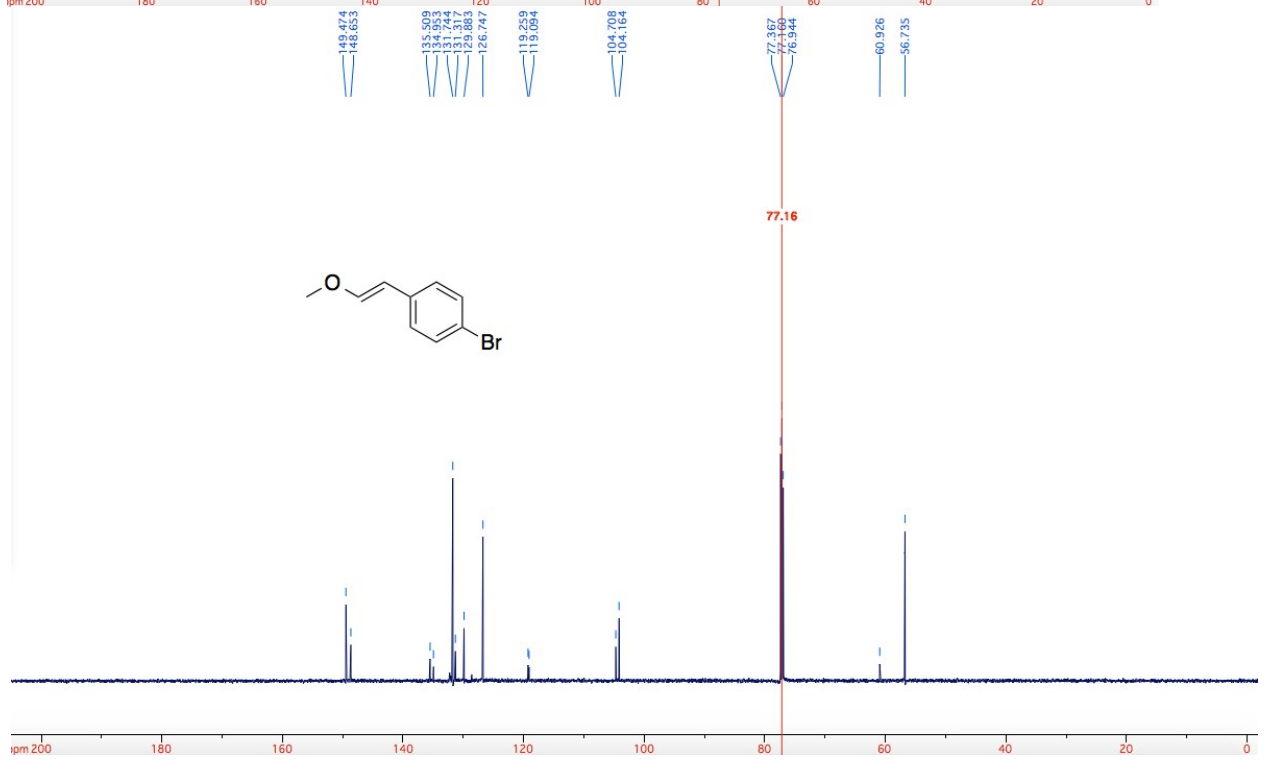

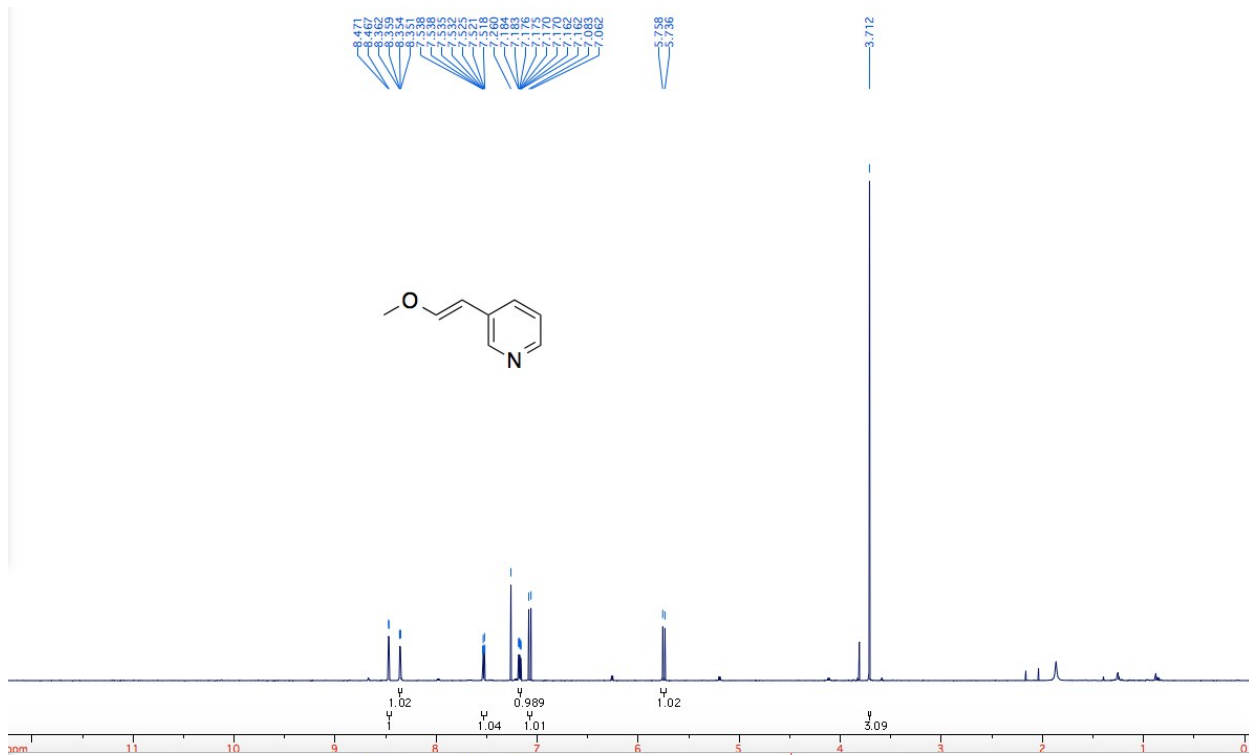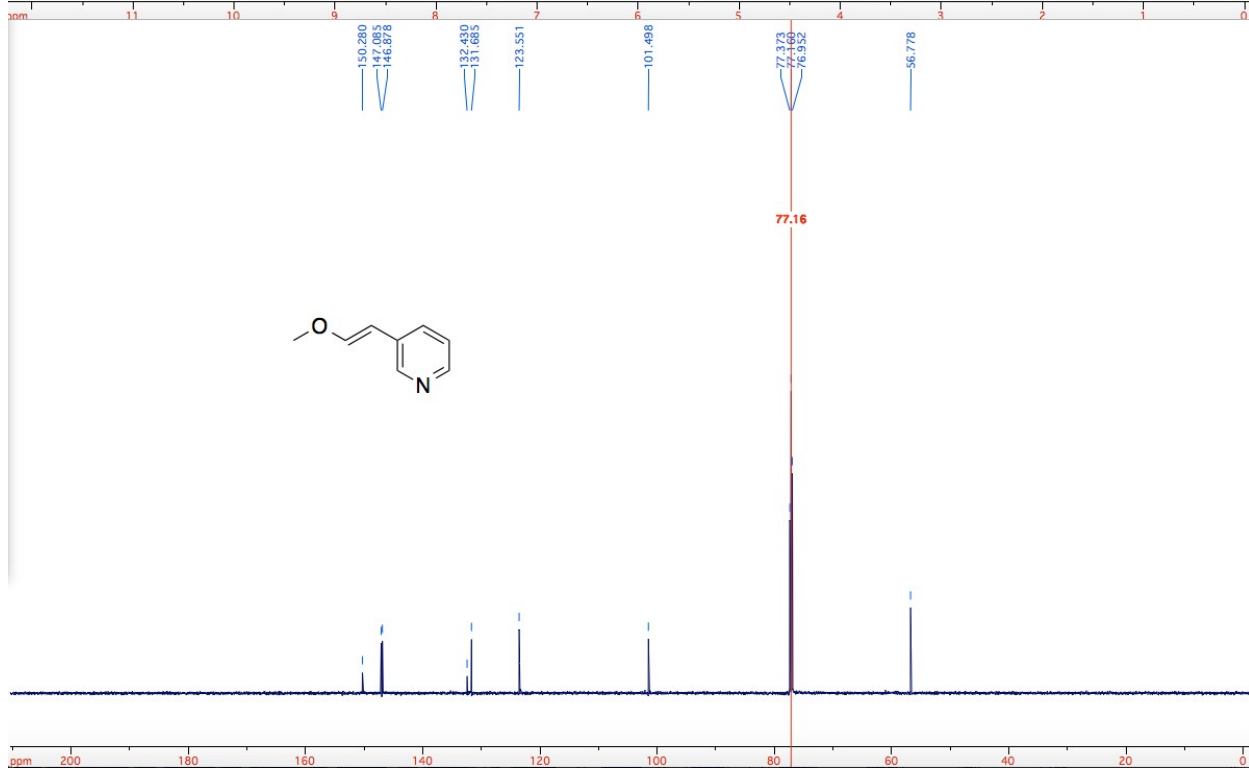

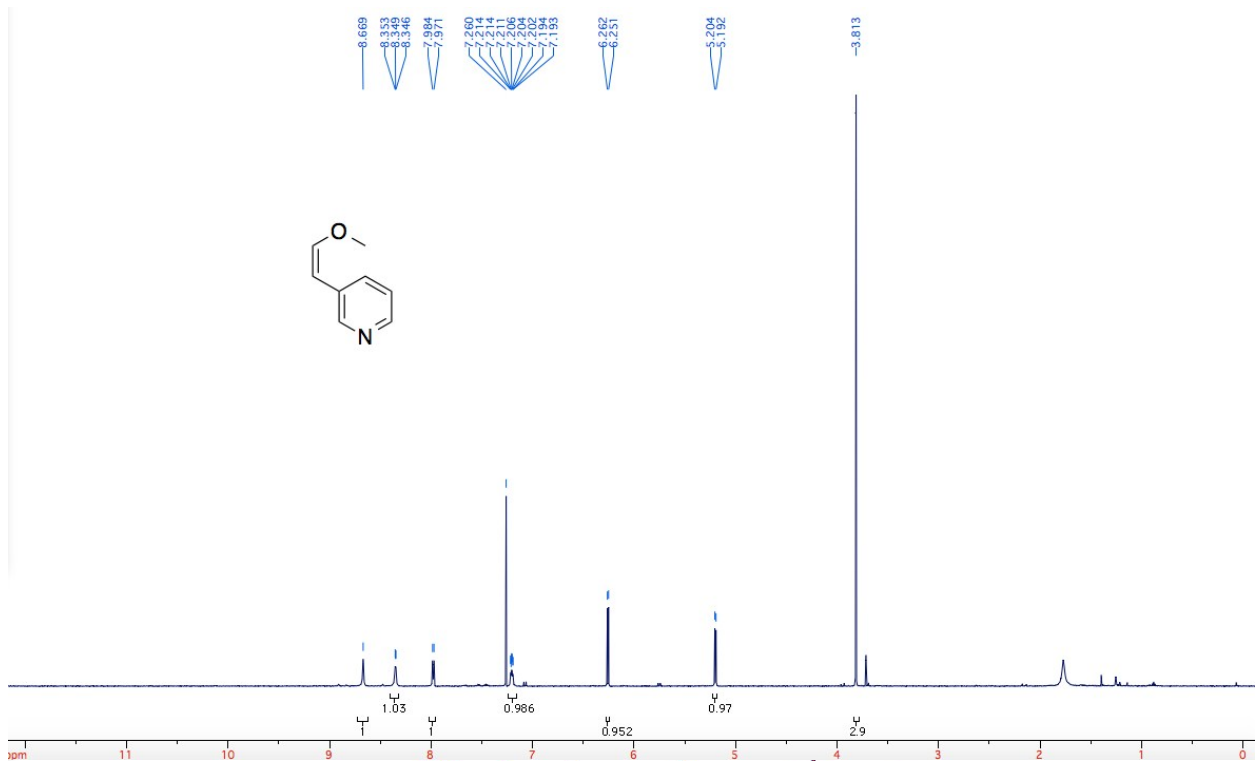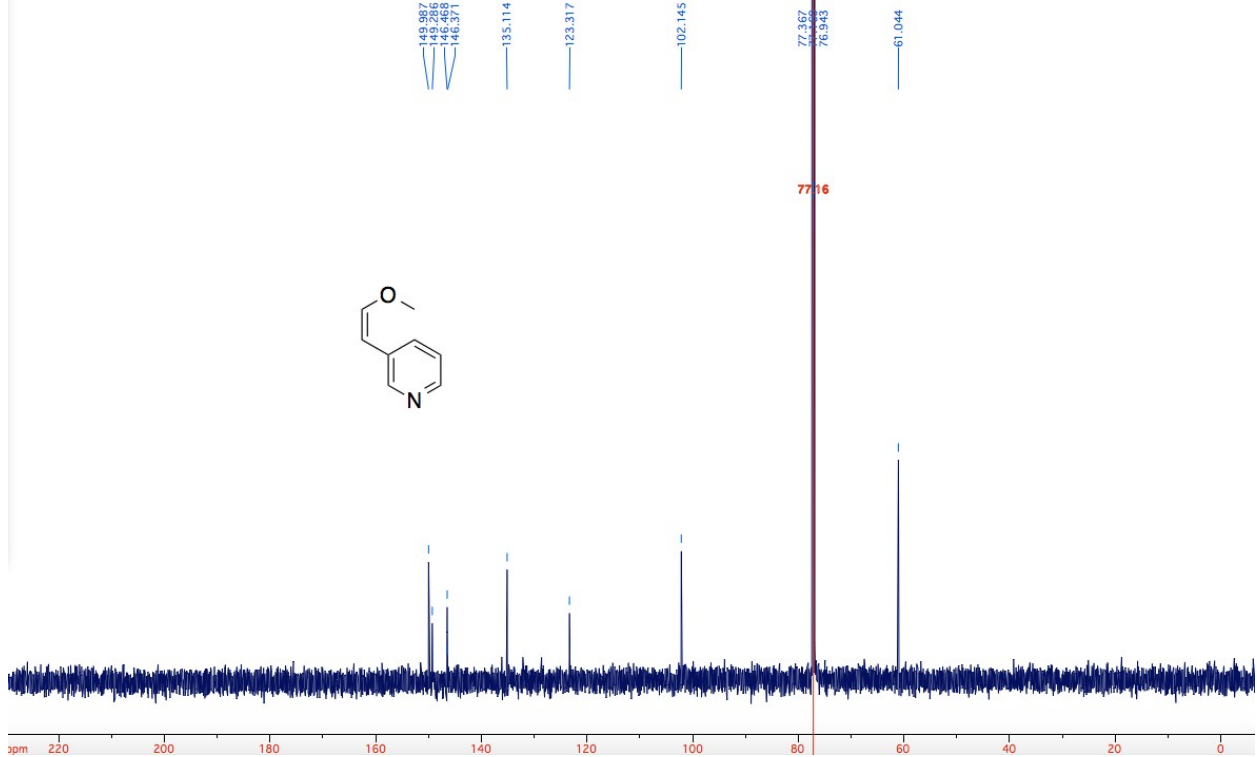

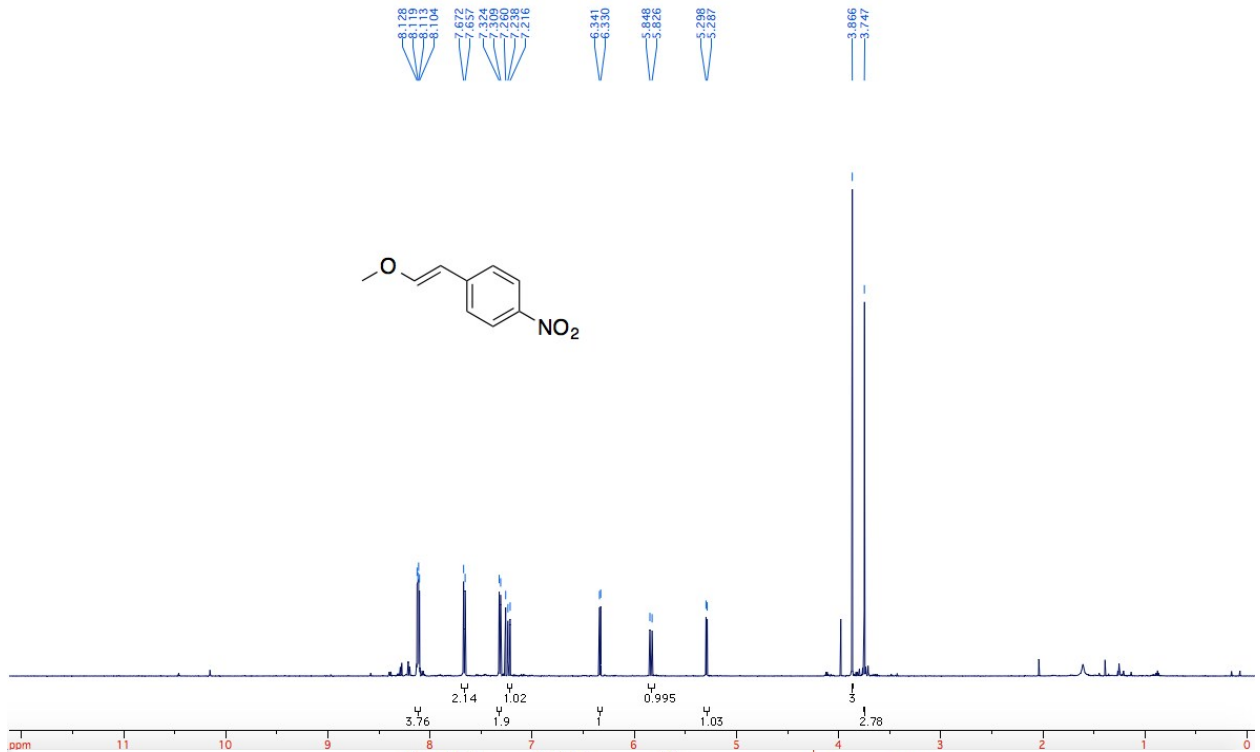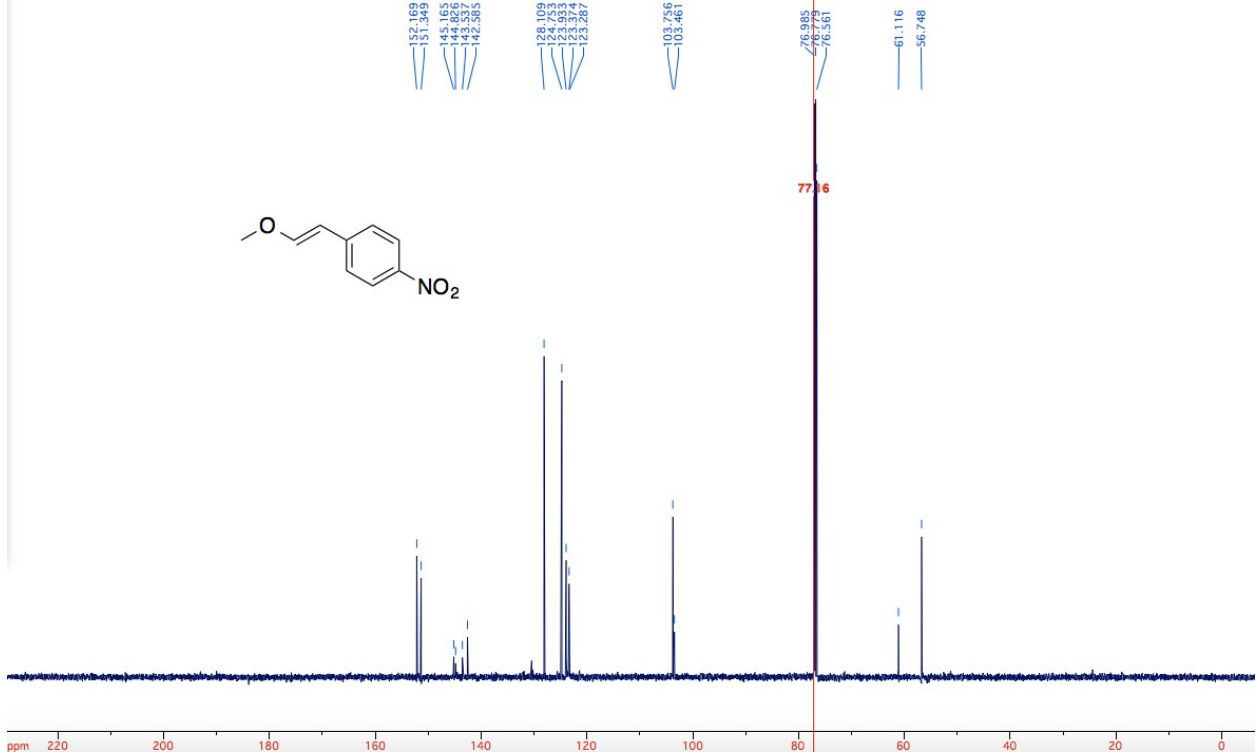

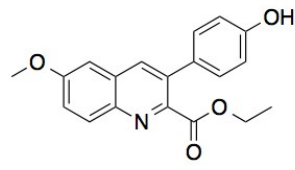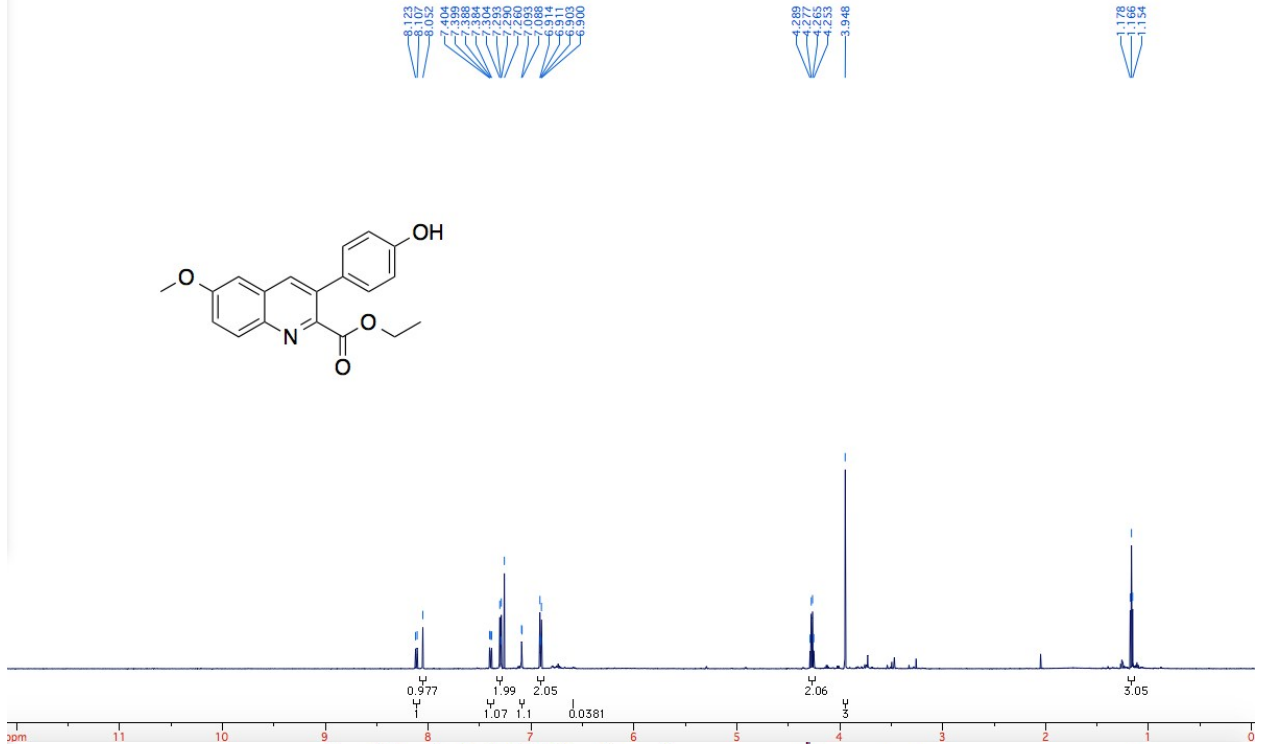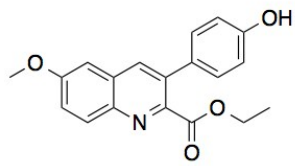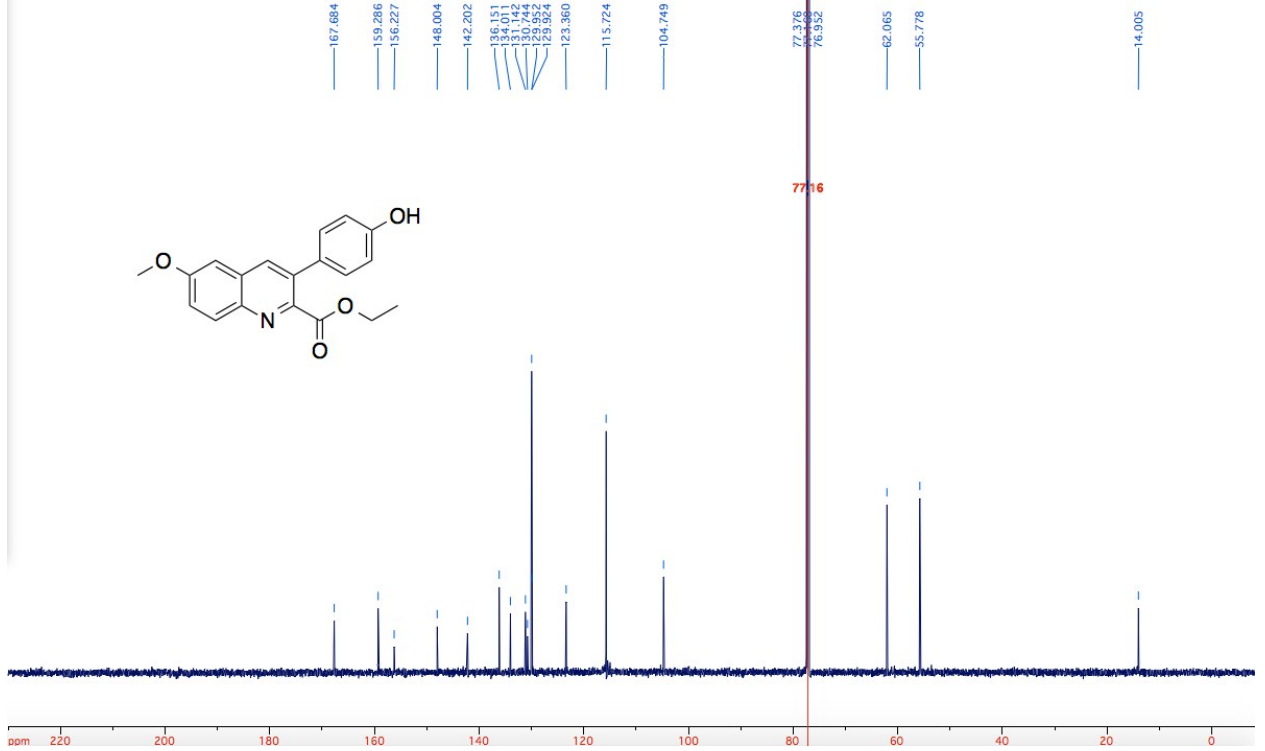

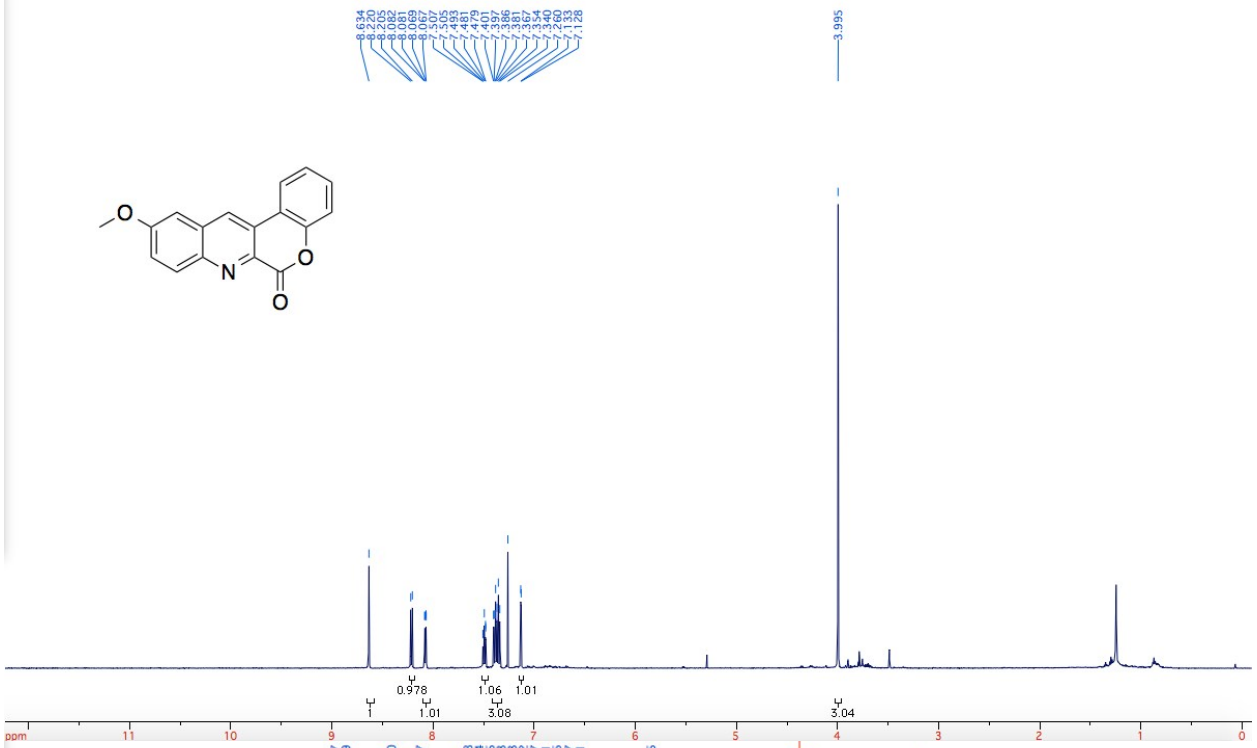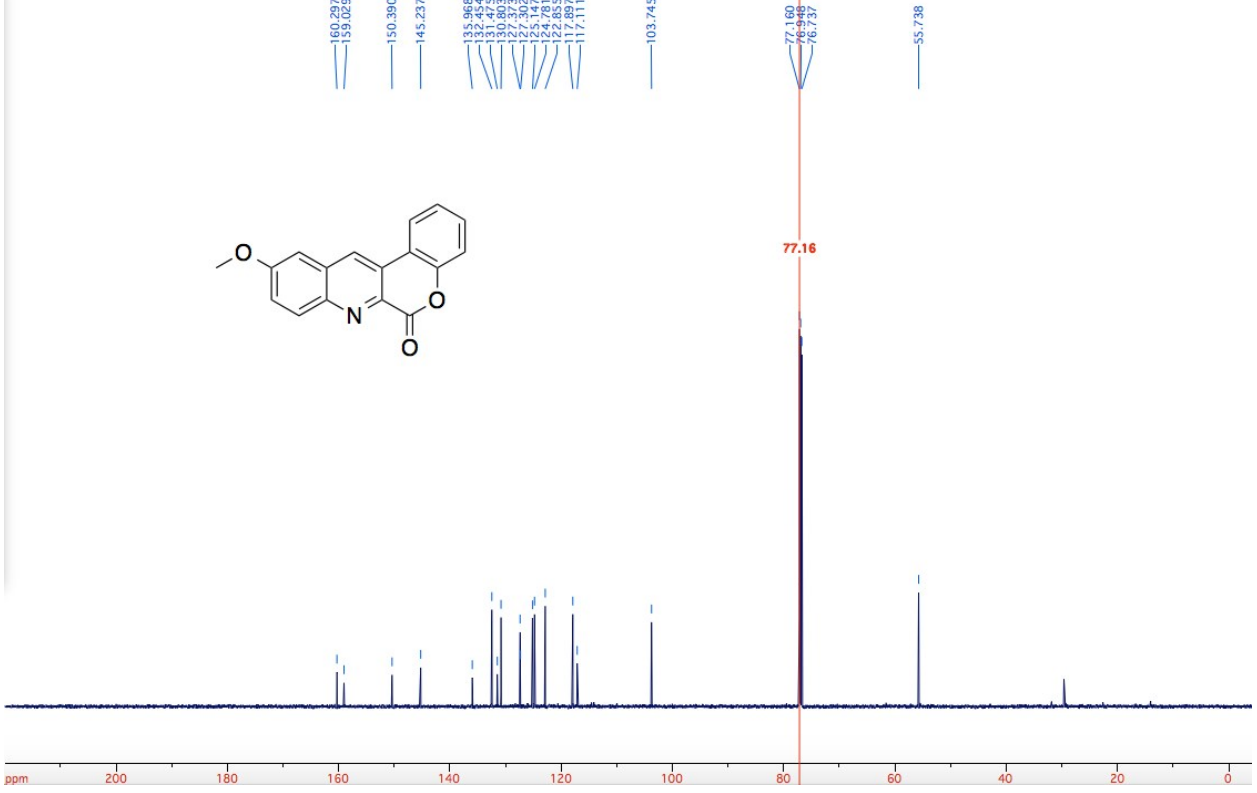



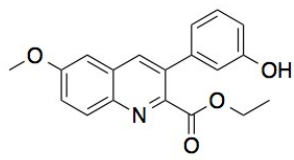

8.191  
8.175  
7.935  
7.831  
7.815  
7.814  
7.808  
7.788  
7.660  
7.594  
6.988  
6.984  
6.985  
6.972  
6.971  
6.958  
6.952  
6.944  
6.900  
6.898  
6.899  
6.886

3.76  
3.22  
2.40  
3.96

1.82  
1.80  
1.18

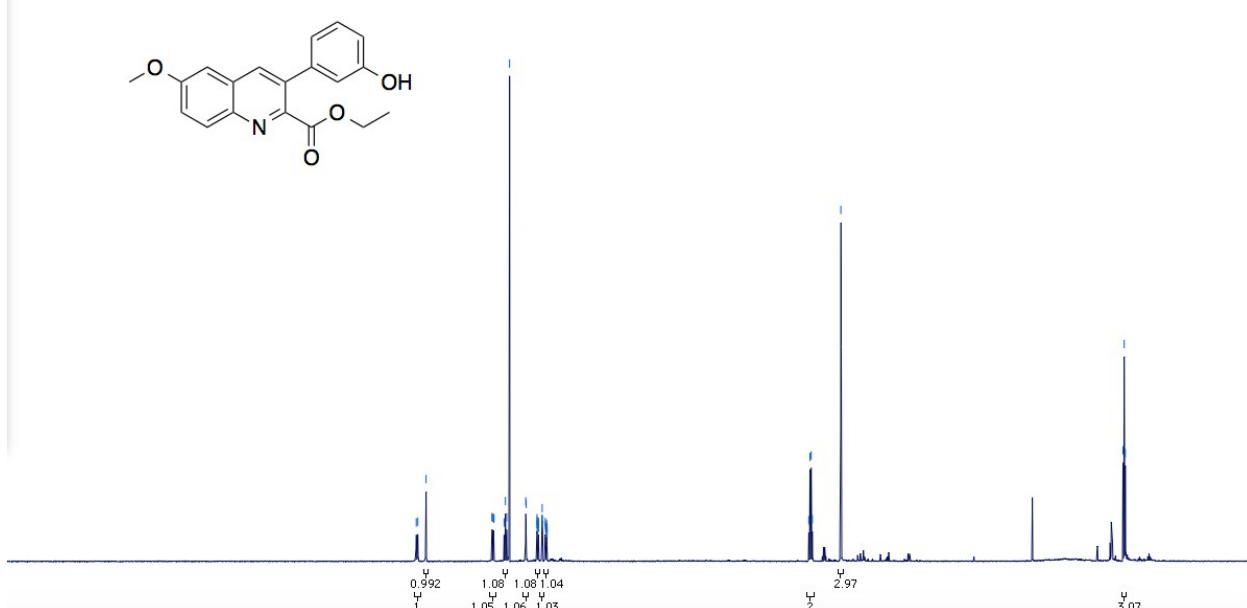

ppm 11 10 9 8 7 6 5 4 3 2 1 0

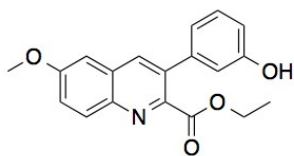

167.452  
159.334  
155.964  
142.577  
140.360  
136.199  
133.955  
131.378  
129.725  
123.523  
121.092  
115.725  
114.657  
104.827

77.367  
76.943

61.996  
55.798

29.850  
13.920

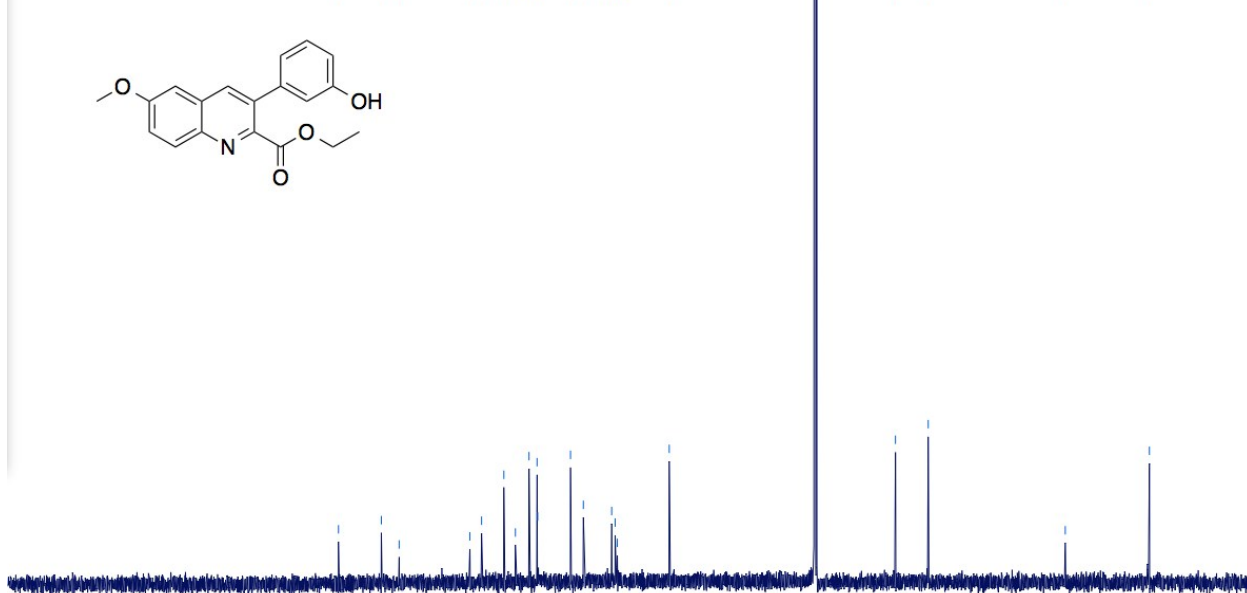

ppm 220 200 180 160 140 120 100 80 60 40 20 0

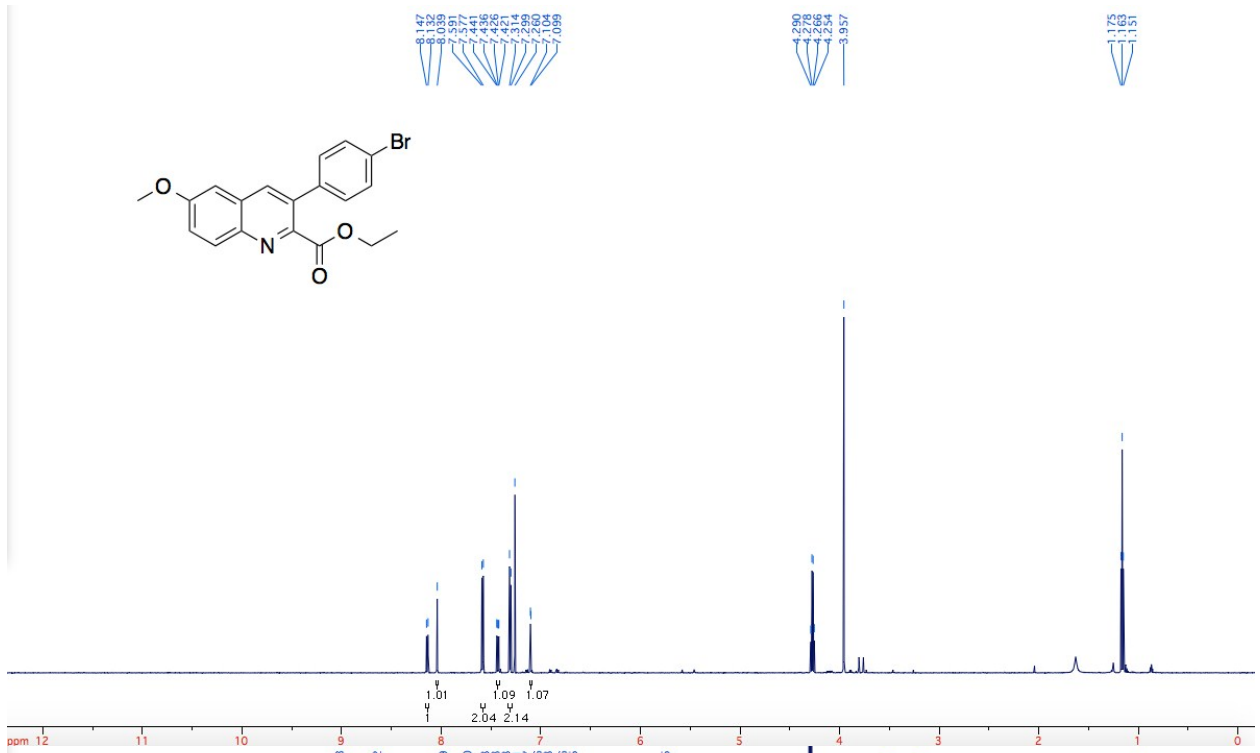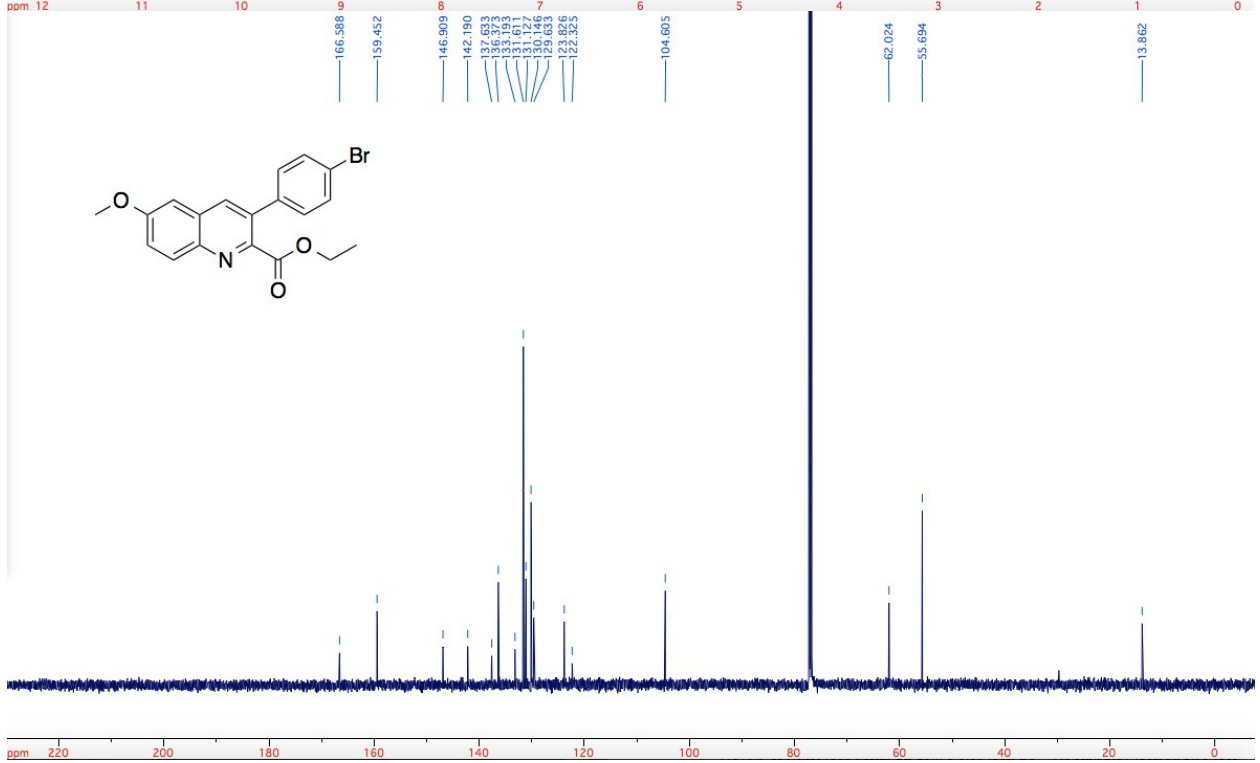

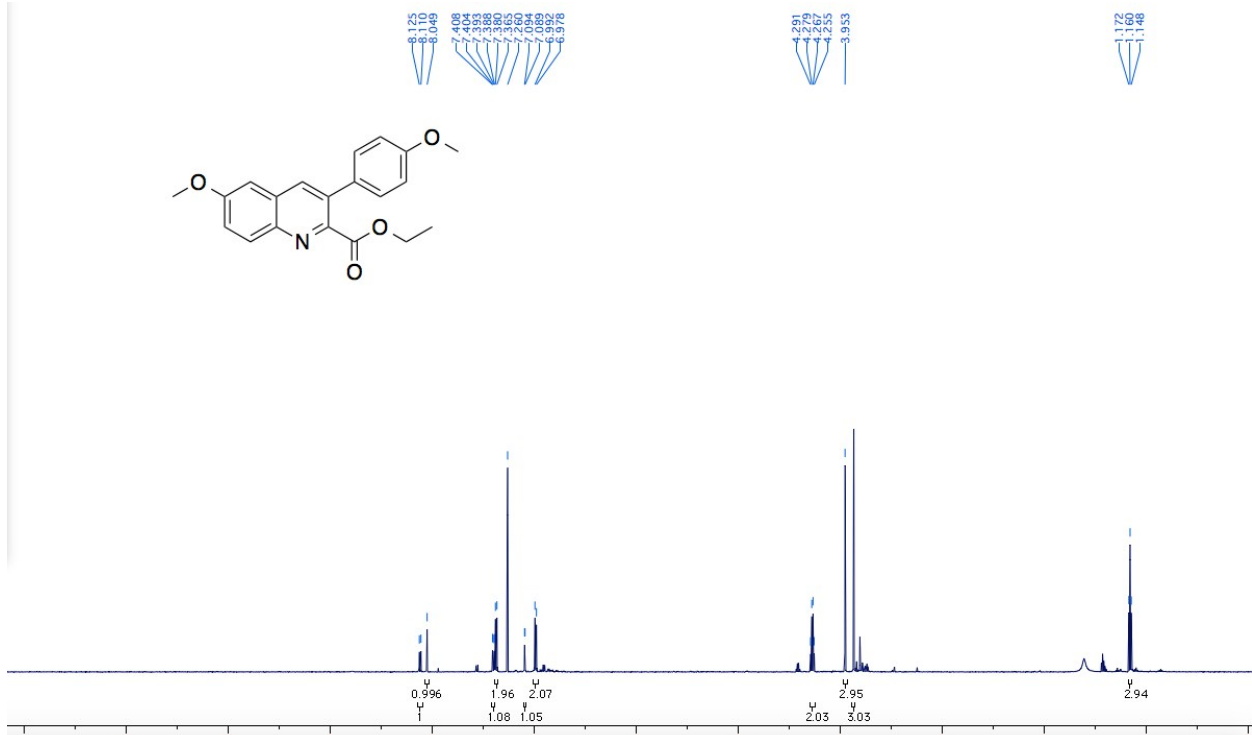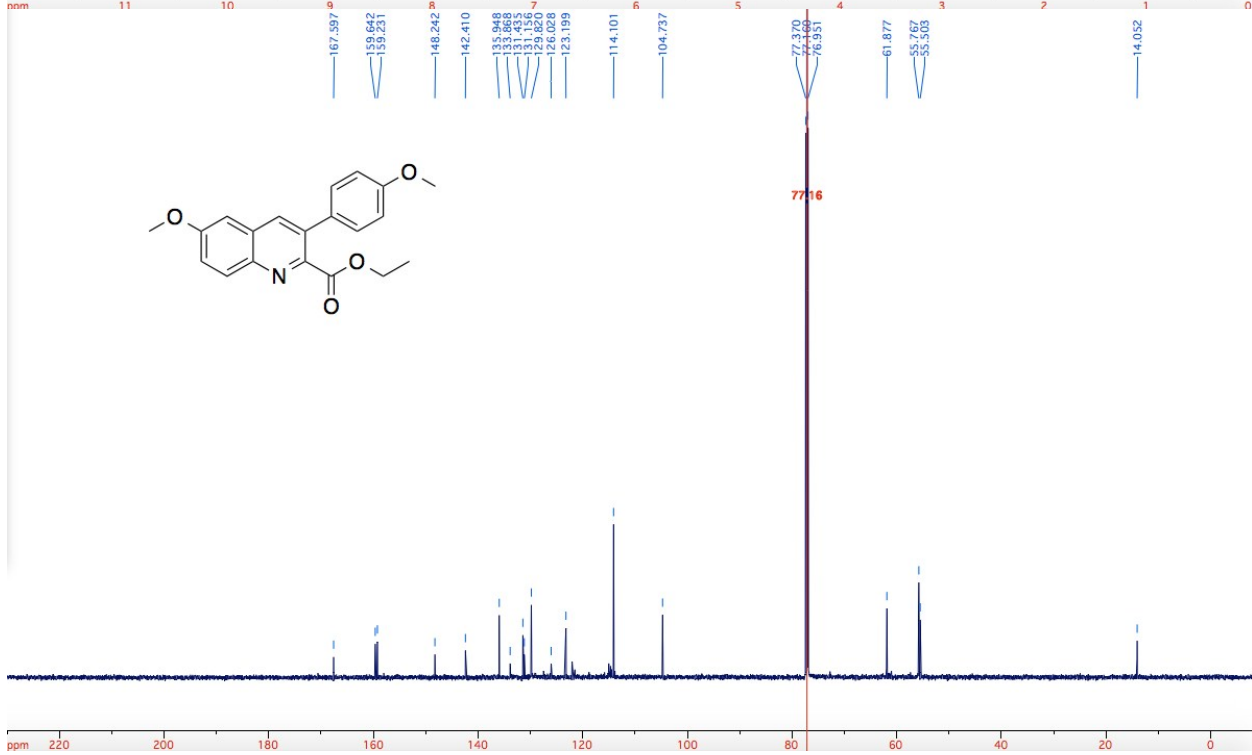

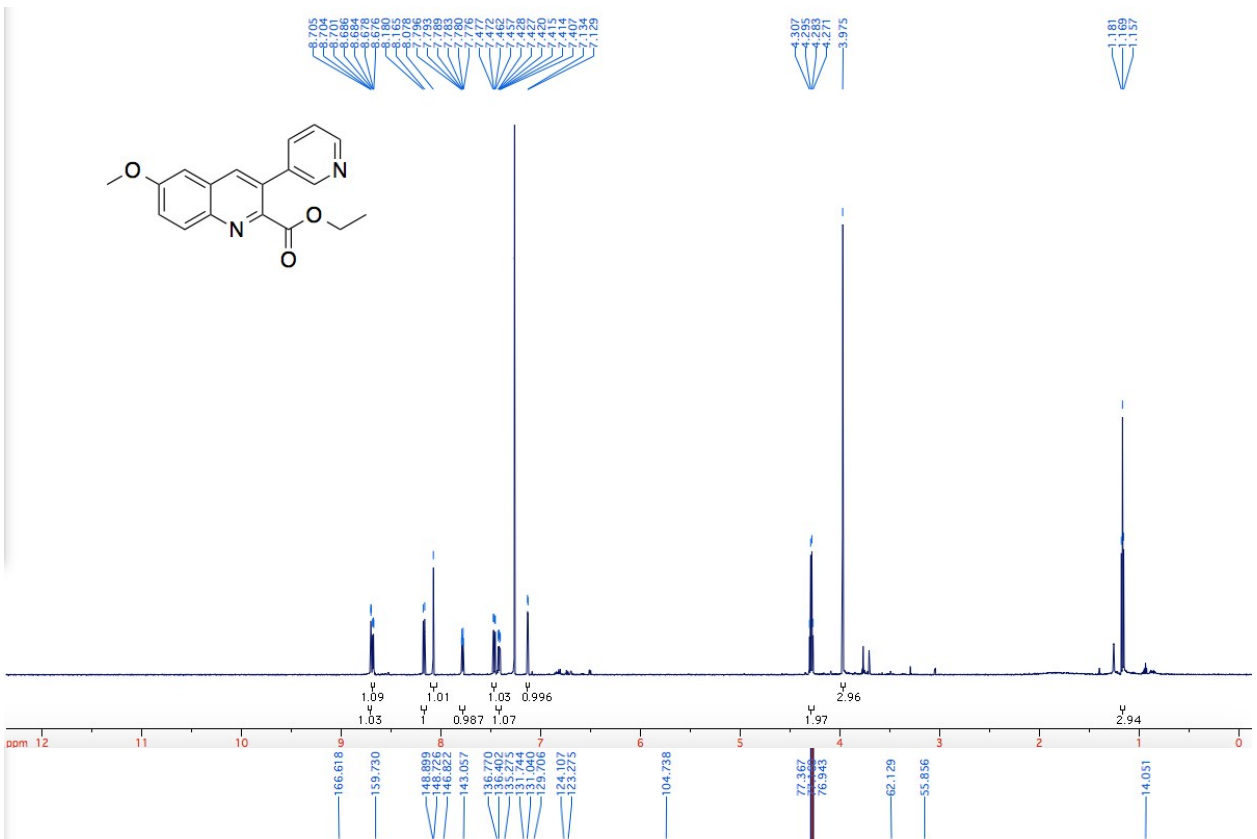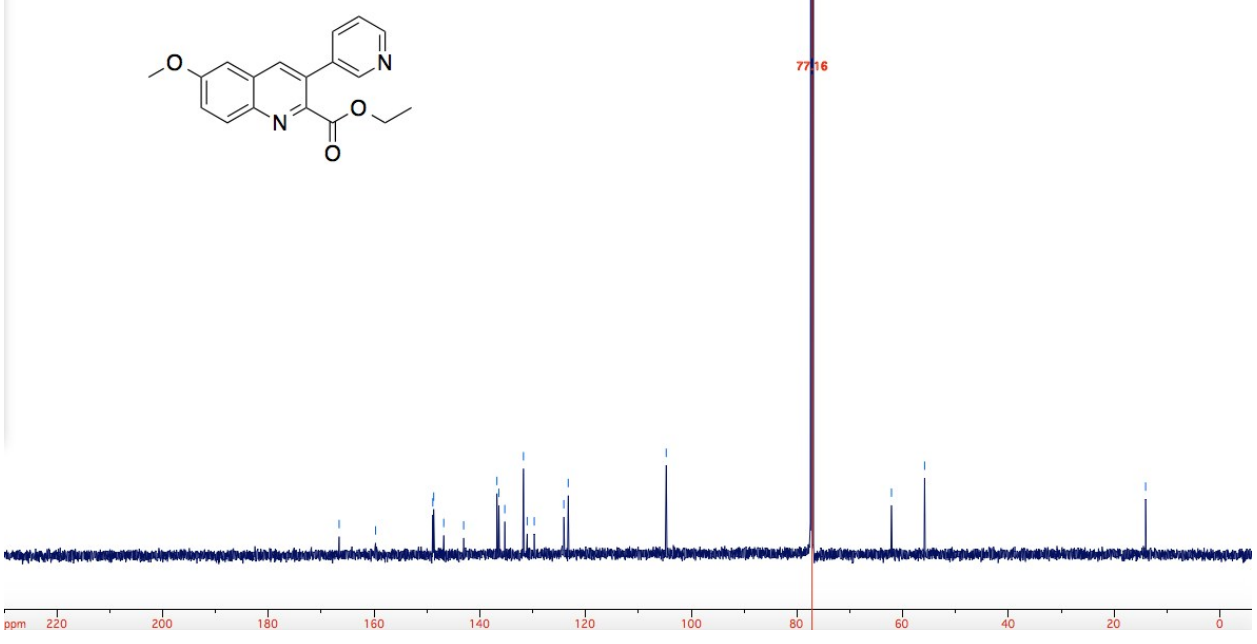

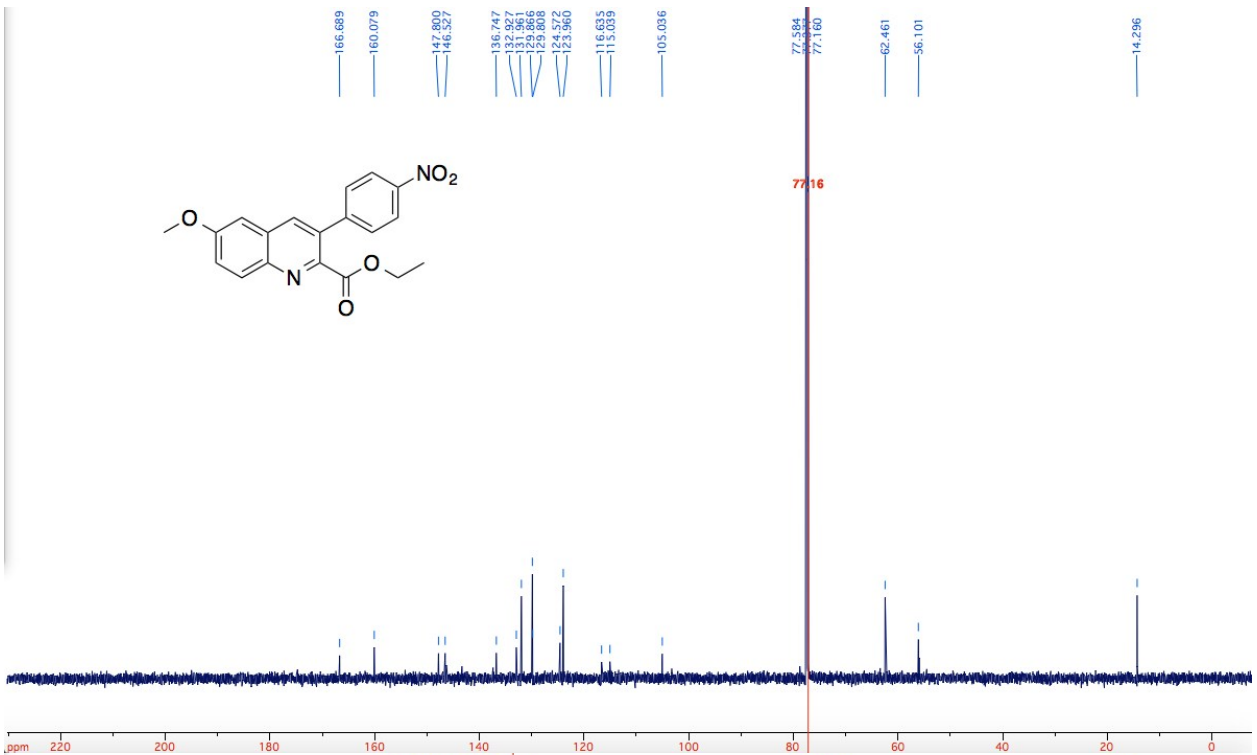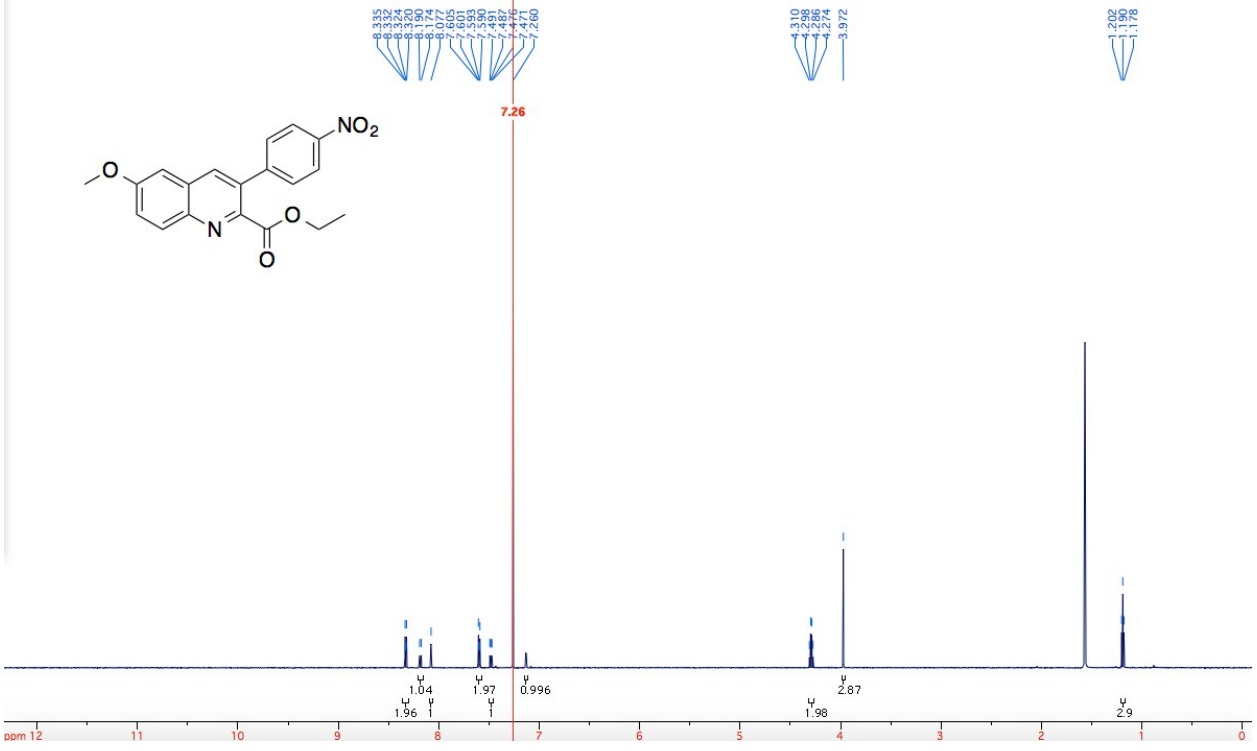

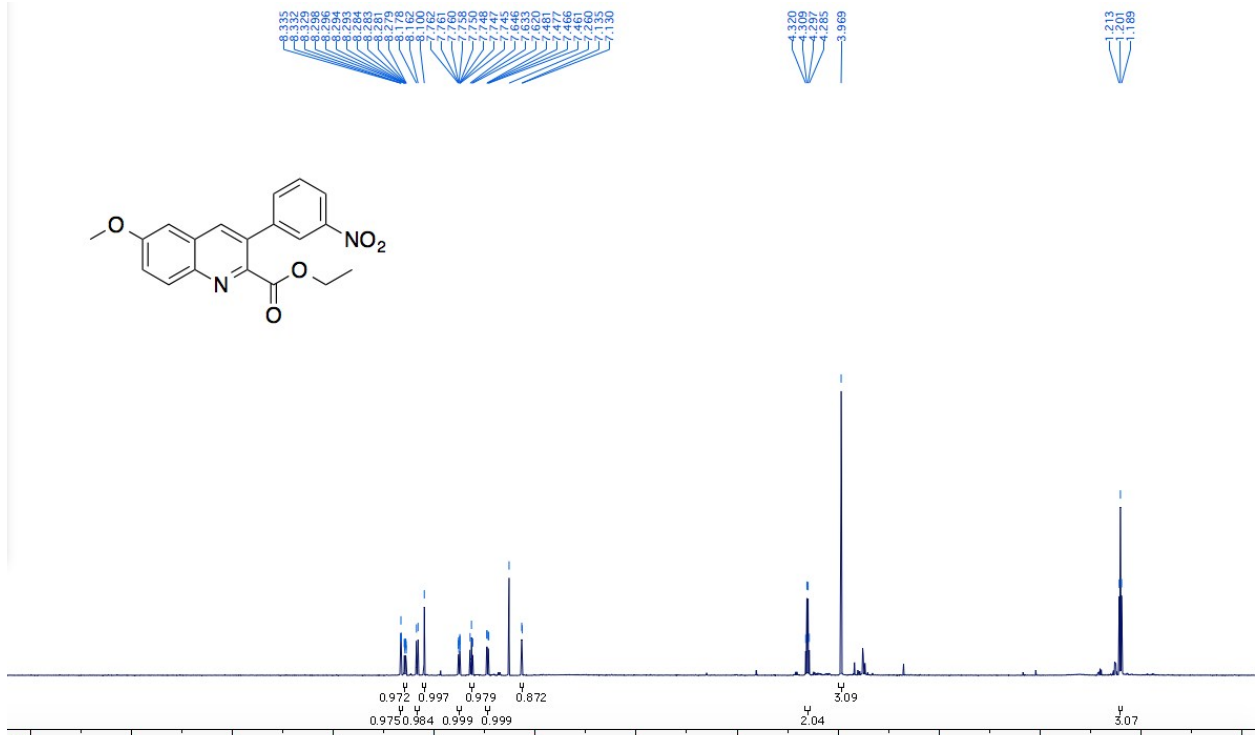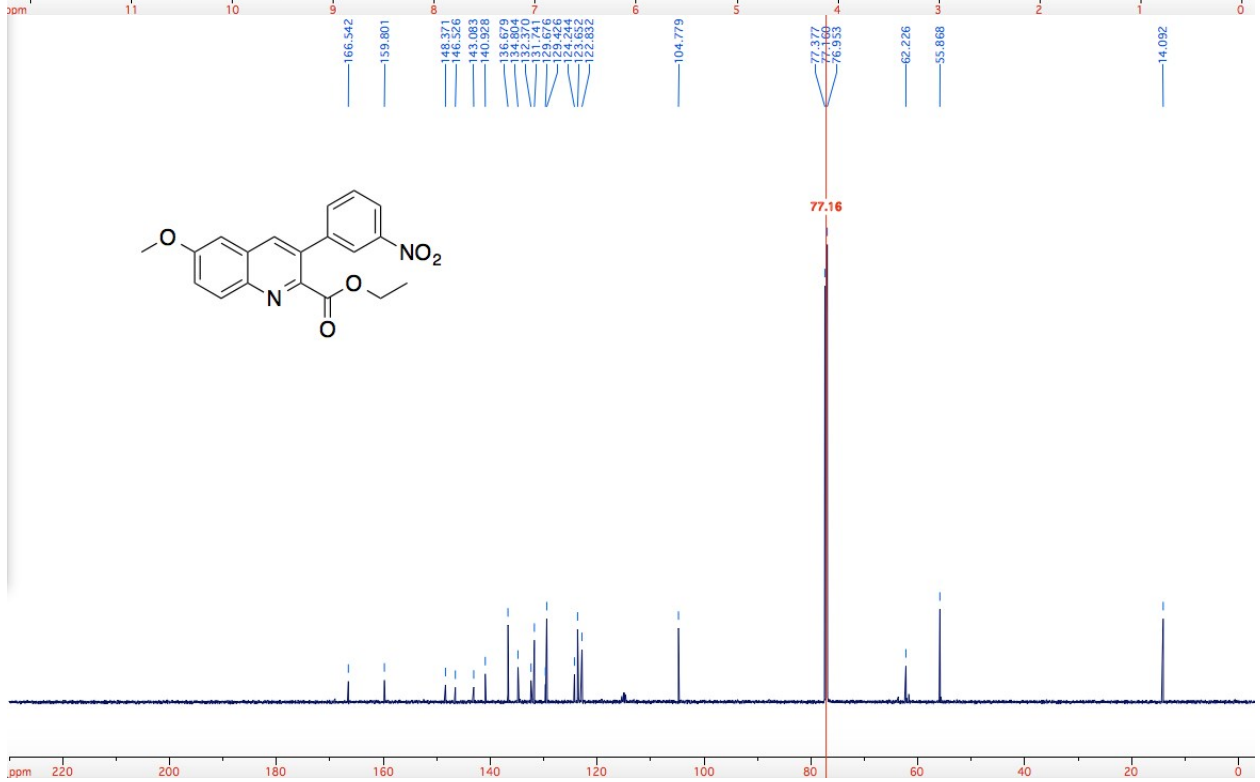

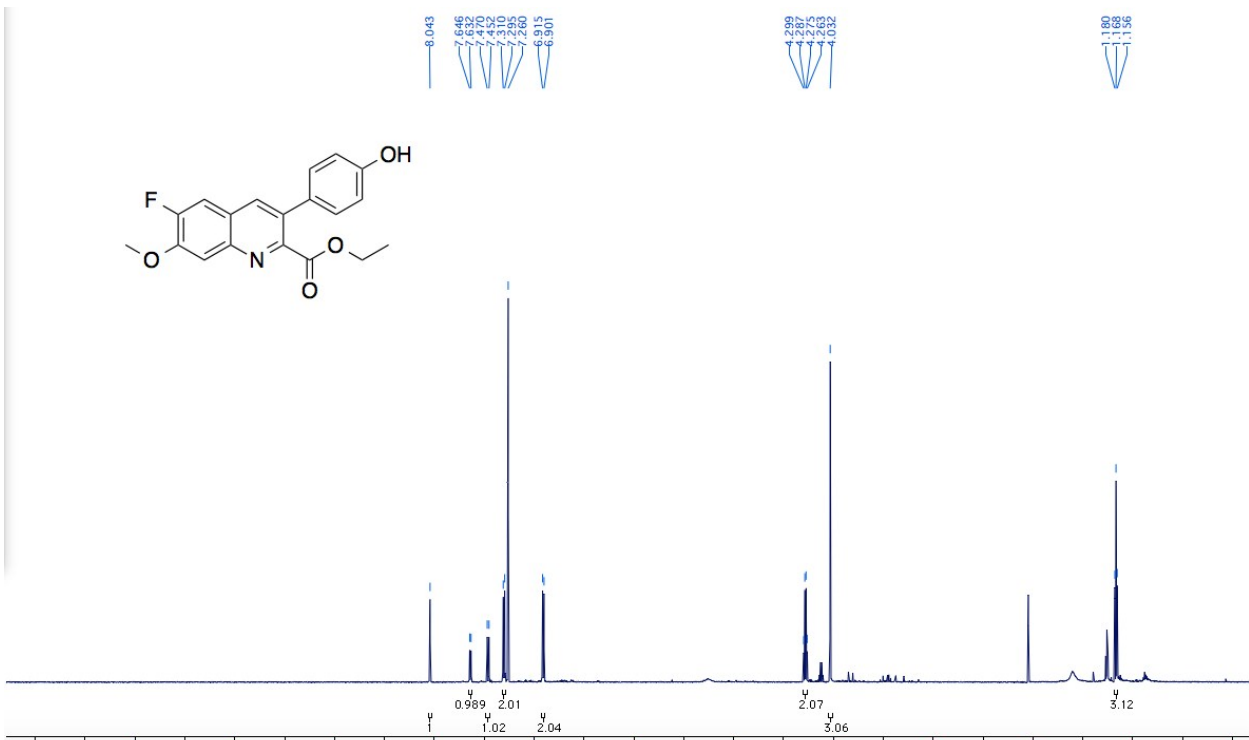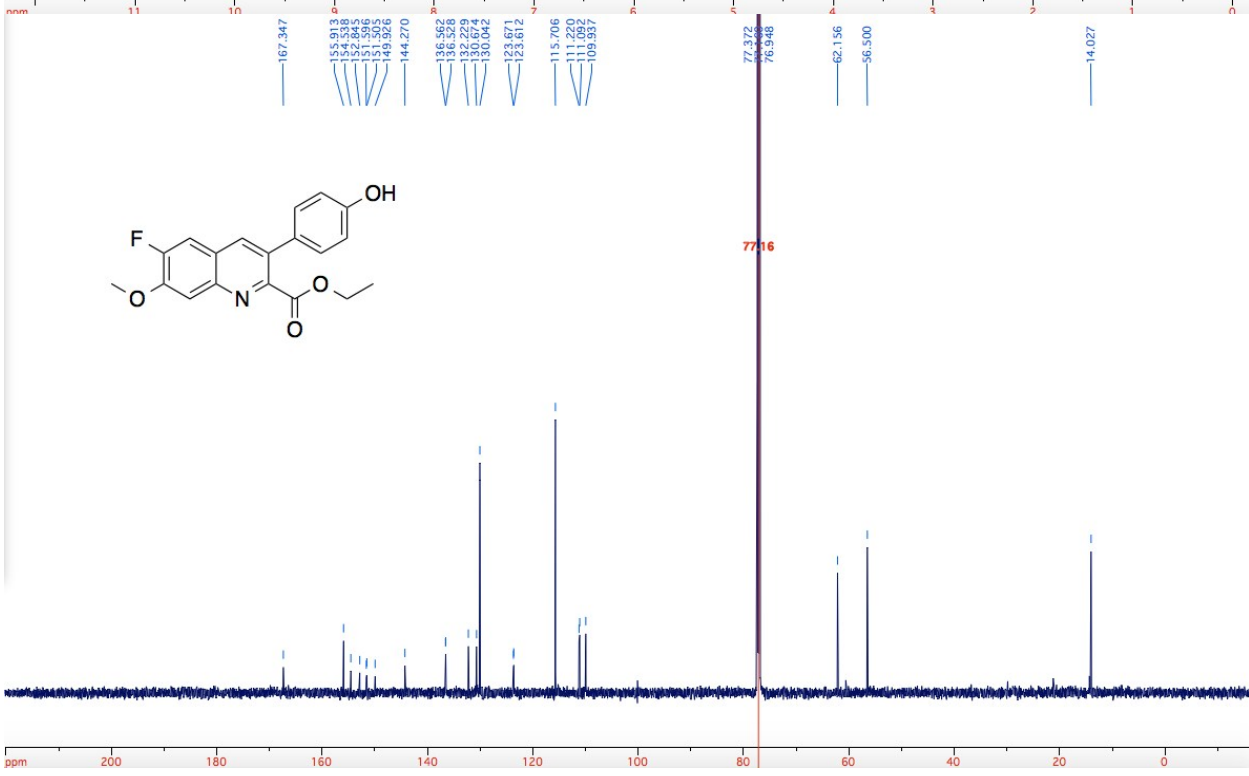

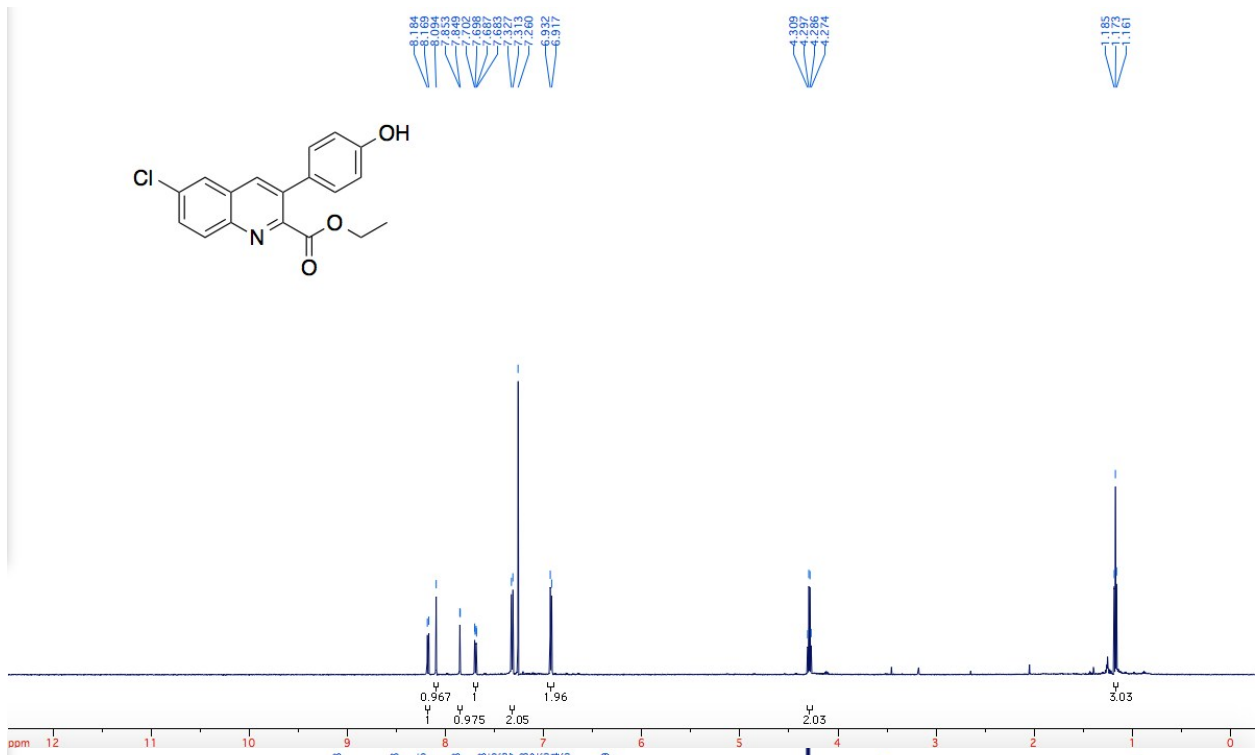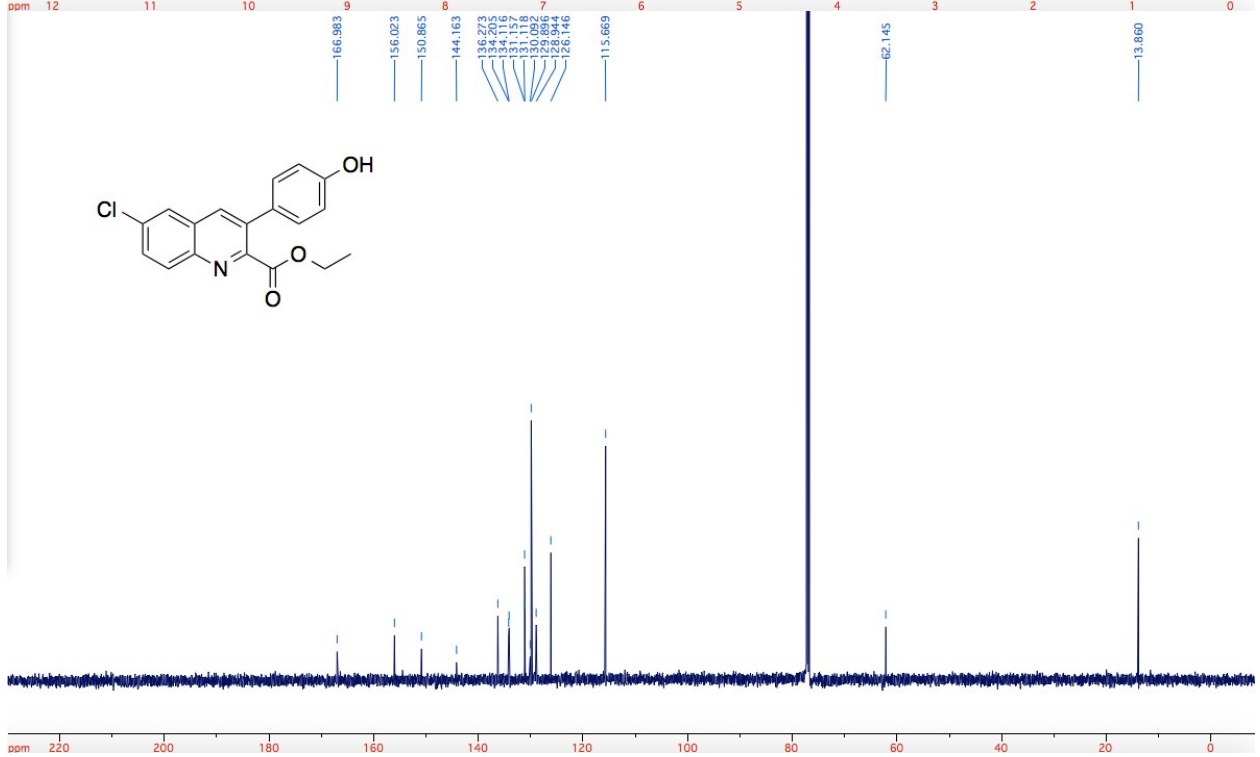



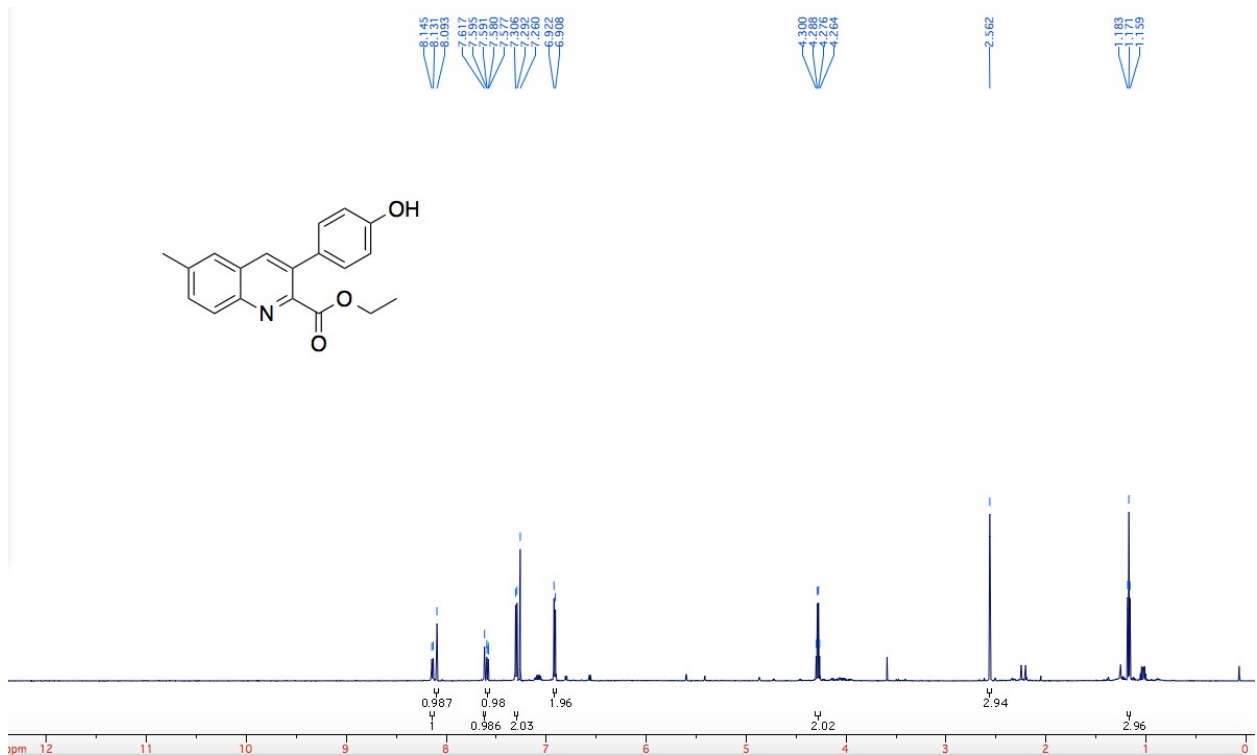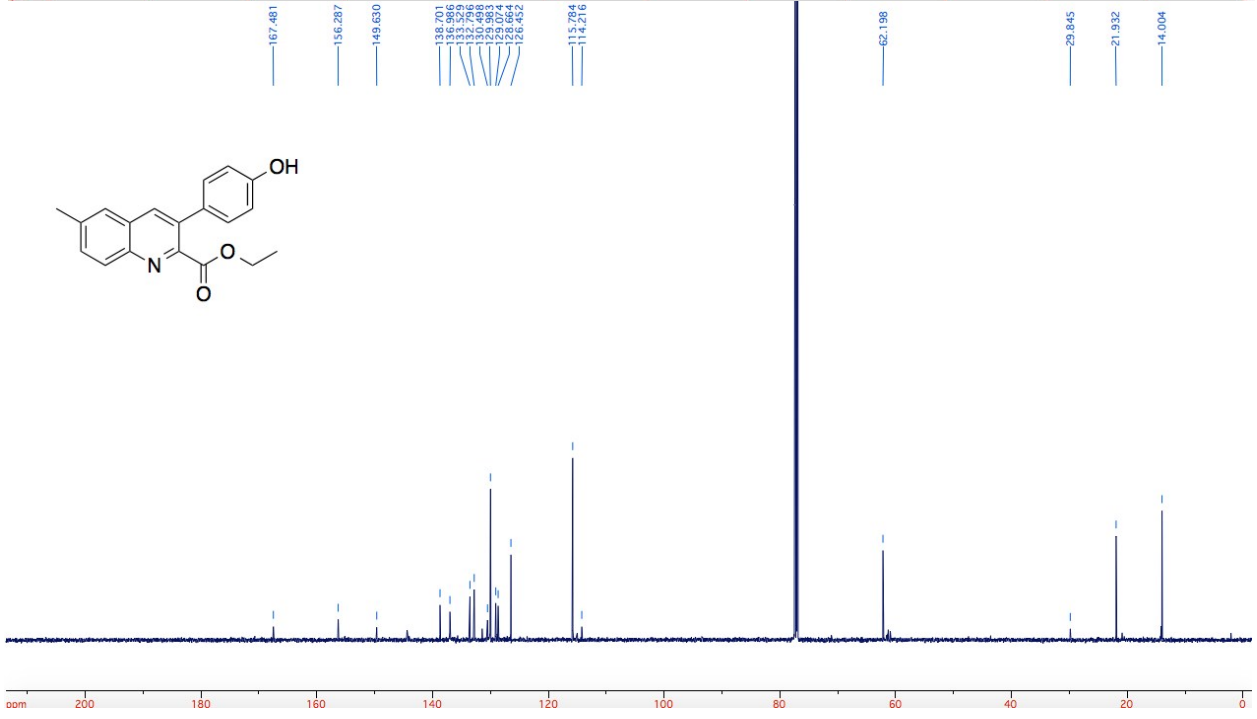

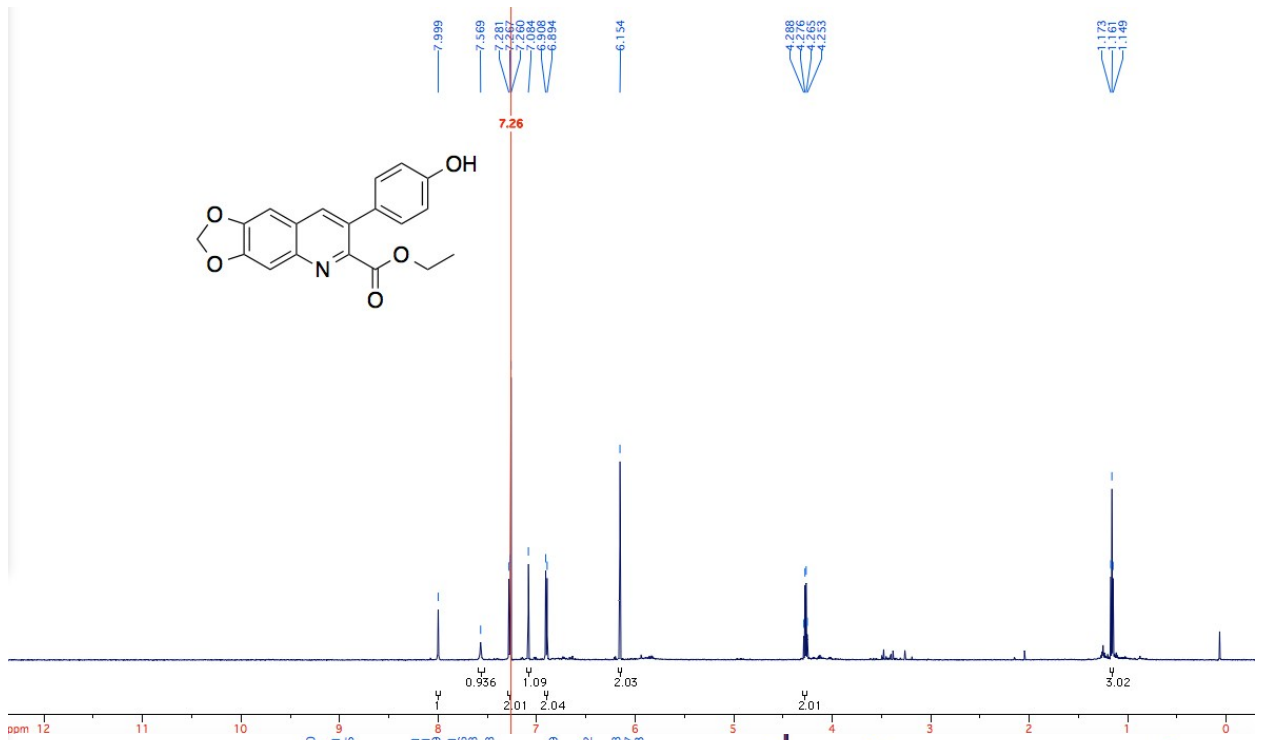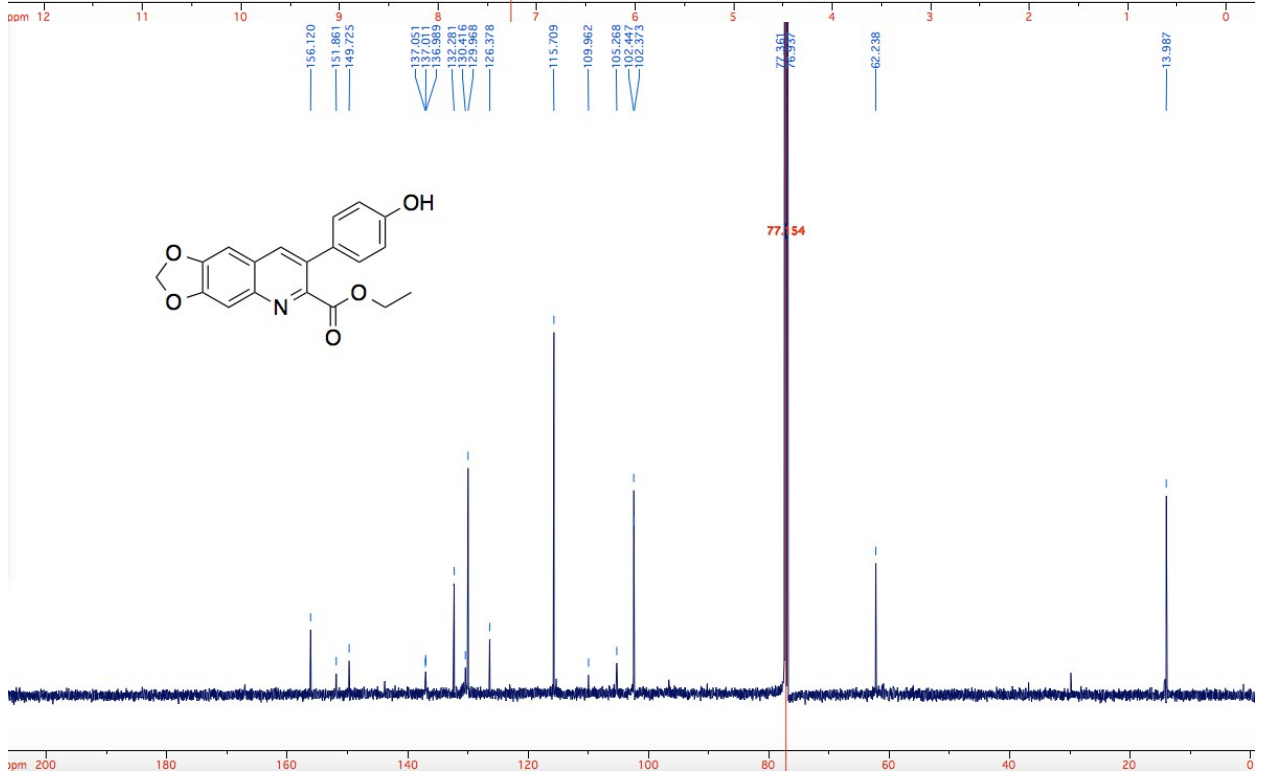

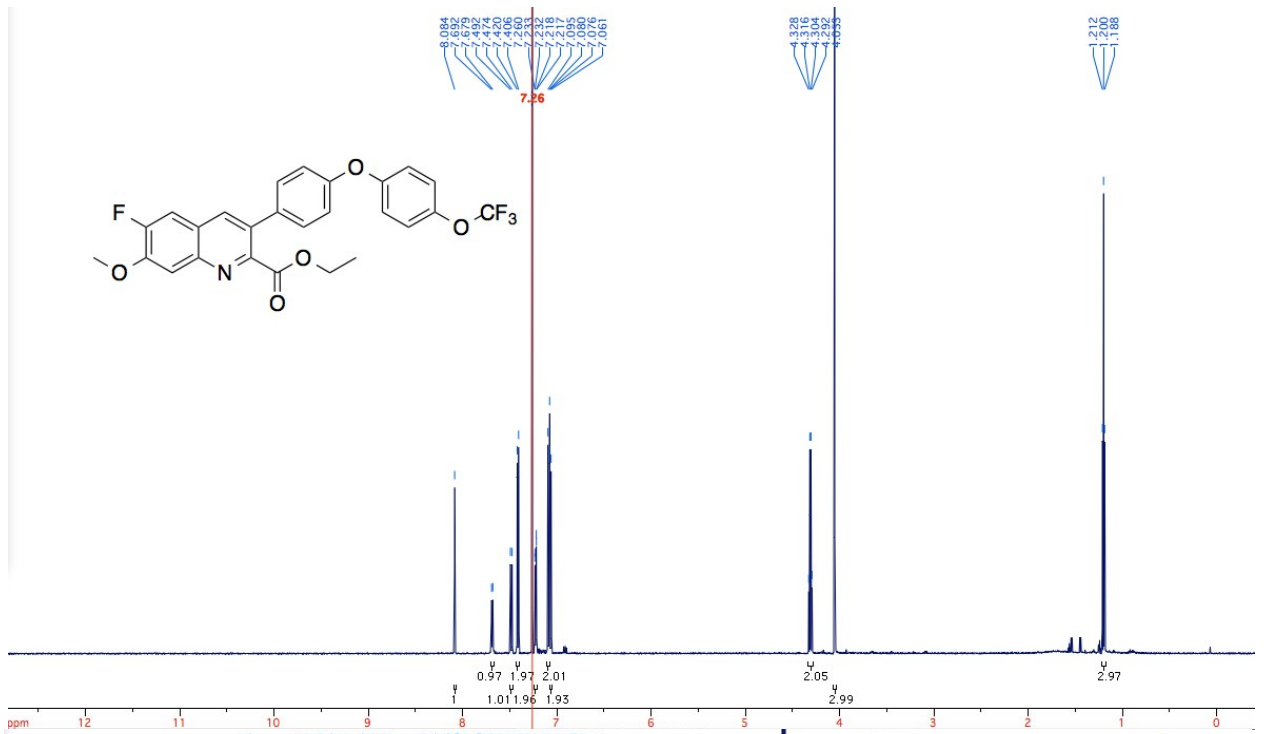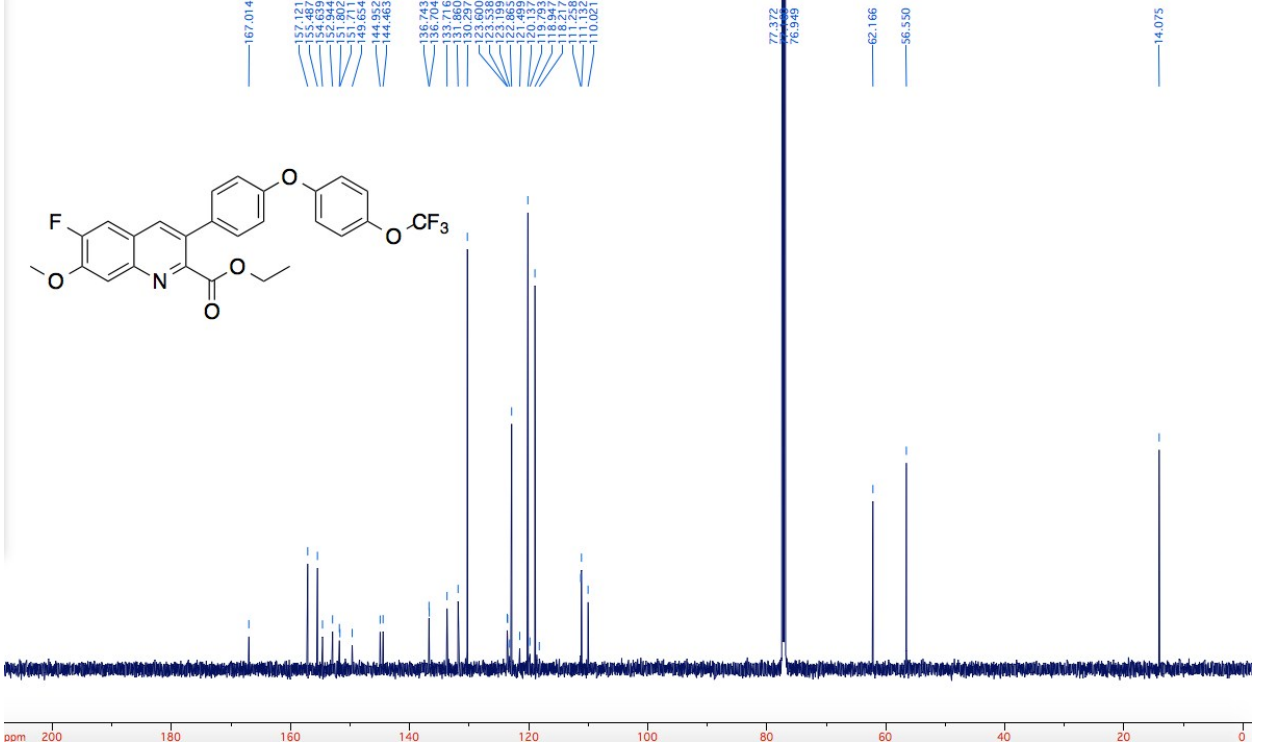

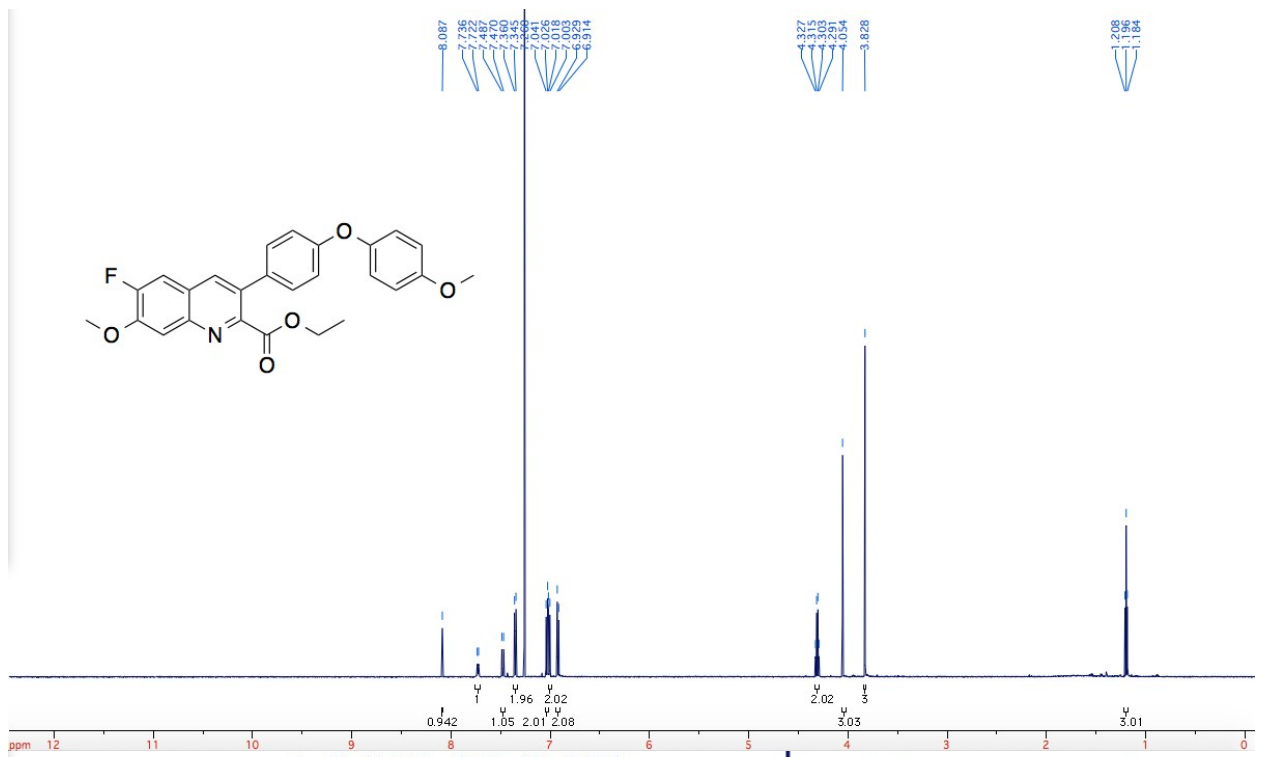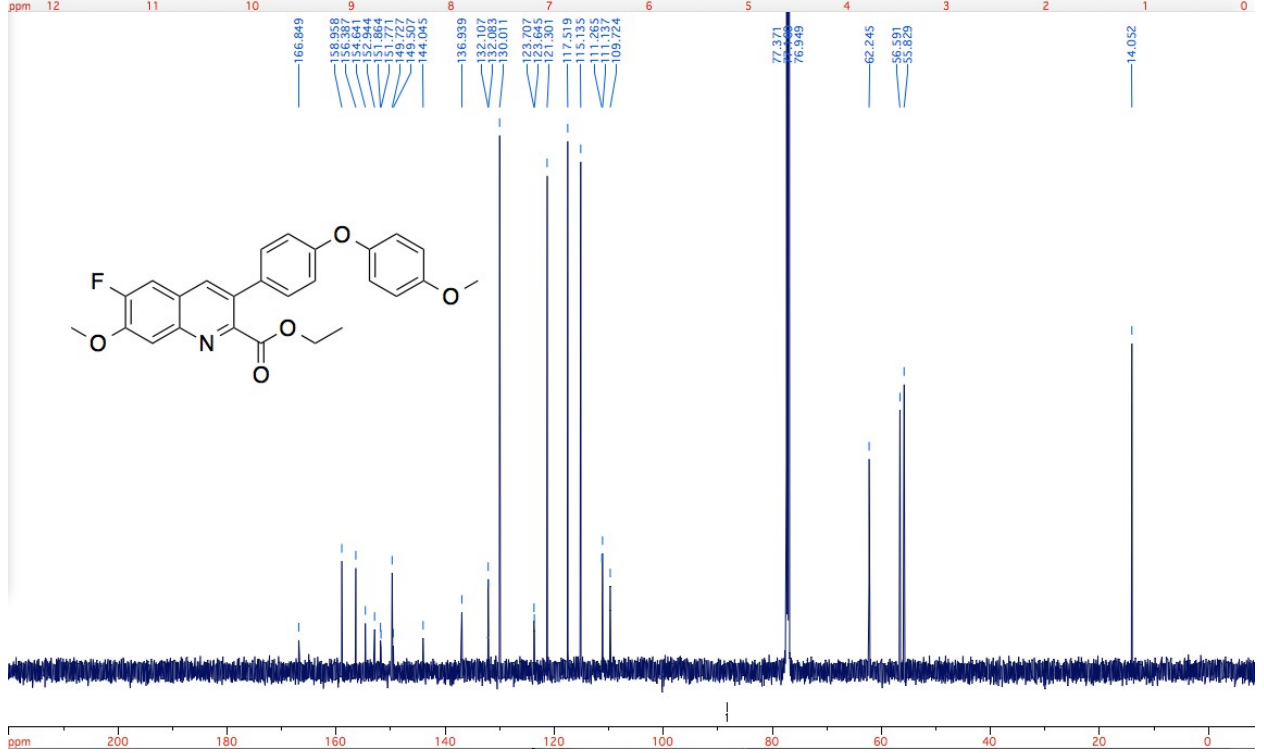

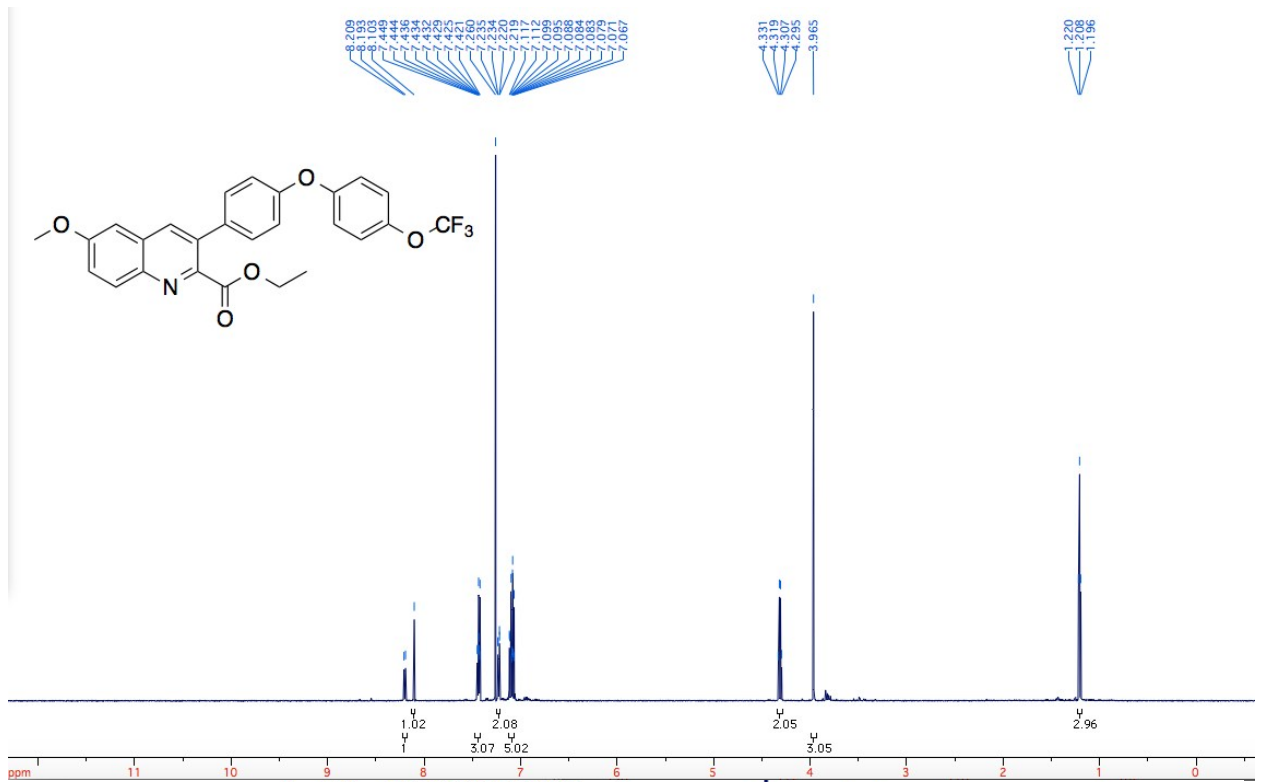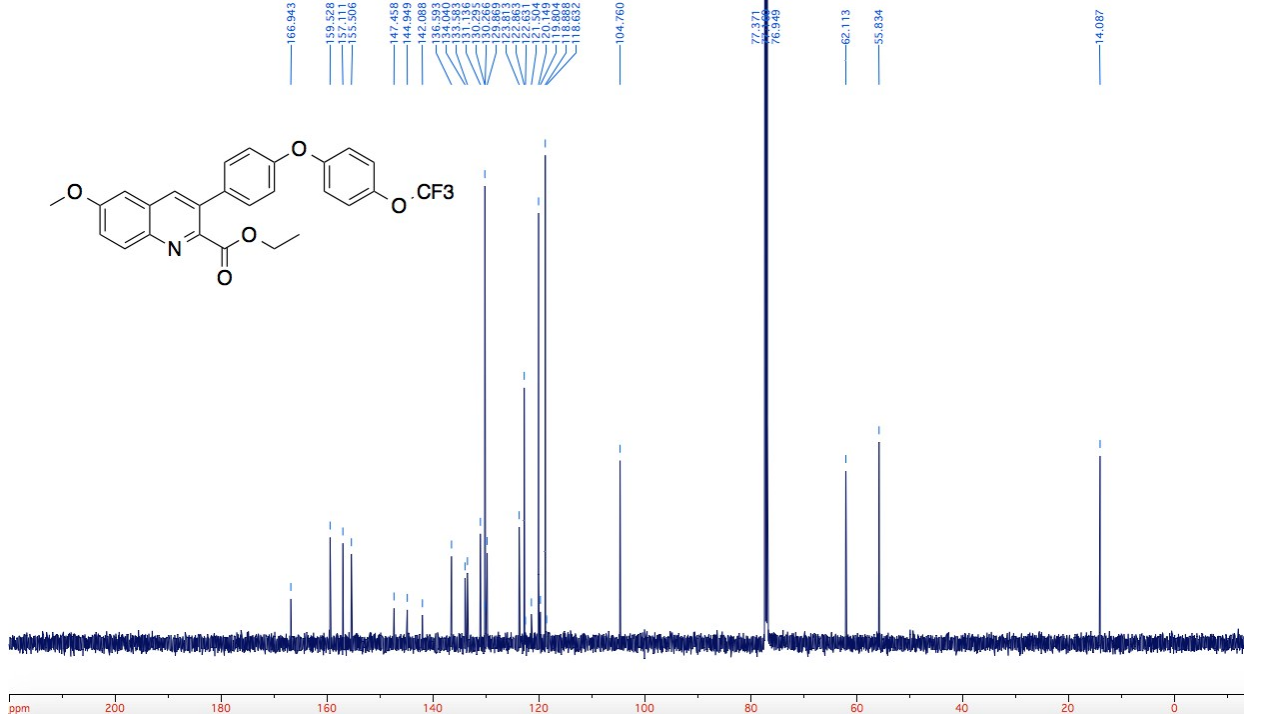

Supplement: c6ob01083k1.pdf [file c6ob01083k1.pdf]
